# Spatial-temporal analysis of nanoparticles in live tumor spheroids impacted by cell origin and density

*Aria Ahmed-Cox,<sup>1,2,3</sup> Elvis Pandzic,<sup>4</sup> Stuart T. Johnston,<sup>5</sup> Celine Heu,<sup>4</sup> John McGhee,<sup>2,6</sup> Friederike M. Mansfeld,<sup>1,2,3,7</sup> Edmund J. Crampin,<sup>5,8,#</sup> Thomas P. Davis,<sup>9</sup> Renee M. Whan,<sup>4</sup> and Maria Kavallaris<sup>1,2,3\*</sup>*

<sup>1</sup> Children's Cancer Institute, Lowy Cancer Research Center, UNSW Sydney, NSW, 2031, Australia

<sup>2</sup> ARC Center of Excellence in Convergent Bio-Nano Science and Technology, Australian Center for NanoMedicine, UNSW Sydney, NSW 2031, Australia

<sup>3</sup> School of Women and Children's Health, Faculty of Medicine and Health, UNSW Sydney, NSW, 2031, Australia

<sup>4</sup> Katharina Gaus Light Microscopy Facility, Mark Wainwright Analytical Center, UNSW Sydney, NSW, 2031, Australia

<sup>5</sup> ARC Center of Excellence in Convergent Bio-Nano Science and Technology, Systems Biology Laboratory, School of Mathematics and Statistics, and Department of Biomedical Engineering, University of Melbourne, Parkville, Victoria, 3010, Australia

<sup>6</sup> 3D Visualisation Aesthetics Lab, UNSW Art & Design, UNSW Sydney, NSW, 2021, Australia

<sup>7</sup> ARC Center of Excellence in Convergent Bio-Nano Science and Technology, Monash Institute  
of Pharmaceutical Sciences, Melbourne, Victoria, 3052, Australia

<sup>8</sup> School of Medicine, Faculty of Medicine Dentistry and Health Sciences, University of  
Melbourne, Parkville, Victoria, 3010, Australia

<sup>9</sup> Precision Medicine, Australian Institute of Bioengineering & Nanotechnology, University of  
Queensland, QLD, 40679, Australia

\* Corresponding author: Maria Kavallaris [m.kavallaris@ccia.unsw.edu.au](mailto:m.kavallaris@ccia.unsw.edu.au)

# Deceased

## 1 ABSTRACT

2 Nanoparticles hold great preclinical promise in cancer therapy but continue to suffer attrition  
3 through clinical trials. Advanced, three dimensional (3D) cellular models such as tumor spheroids  
4 can recapitulate elements of the tumor environment and are considered the superior model to  
5 evaluate nanoparticle designs. However, there is an important need to better understand  
6 nanoparticle penetration kinetics and determine how different cell characteristics may influence  
7 this nanoparticle uptake. A key challenge with current approaches for measuring nanoparticle  
8 accumulation in spheroids is that they are often static, losing spatial and temporal information  
9 which may be necessary for effective nanoparticle evaluation in 3D cell models. To overcome this  
10 challenge, we developed an analysis platform, termed the Determination of Nanoparticle Uptake  
11 in Tumor Spheroids (DONUTS), which retains spatial and temporal information during  
12 quantification, enabling evaluation of nanoparticle uptake in 3D tumor spheroids. Outperforming  
13 linear profiling methods, DONUTS was able to measure silica nanoparticle uptake to 10  $\mu\text{m}$   
14 accuracy in both isotropic and irregularly shaped cancer cell spheroids. This was then extended to  
15 determine penetration kinetics, first by a forward-in-time, center-in-space model, and then by  
16 mathematical modelling, which enabled the direct evaluation of nanoparticle penetration kinetics  
17 in different spheroid models. Nanoparticle uptake was shown to inversely relate to particle size  
18 and varied depending on the cell type, cell stiffness and density of the spheroid model. The  
19 automated analysis method we have developed can be applied to live spheroids *in situ*, for the  
20 advanced evaluation of nanoparticles as delivery agents in cancer therapy.

21 KEYWORDS: Nanoparticles, tumor spheroids, microscopy, fluorescence imaging, mathematical  
22 modelling, uptake kinetics.

23 Nanoparticles have been heralded for their potential to revolutionise cancer therapy, by  
24 improving drug delivery and reducing collateral toxicity of therapies in patients [1]. However, the  
25 diversity of their biophysical characteristics (e.g. size, shape, charge and surface coating) has also  
26 created challenges in attaining a robust understanding of how nanoparticles interact with the local  
27 and peripheral tumor environment, and has ultimately hindered their progression to the clinic [2-  
28 4]. Multidisciplinary studies to better evaluate how nanoparticle designs affect biocompatibility,  
29 circulation, extravasation and drug efficacy have been a key focus in recent years [5-8]. Yet, the  
30 quantification of nanoparticle tumor penetration has received less attention, and current analysis  
31 approaches are not optimized to account for cell and tissue variability. Attention in this area is  
32 arguably as critical as nanoparticle circulation and extravasation, as tumor penetration and  
33 subsequent cellular uptake will ultimately dictate nanoparticle efficacy.

34 A major variable in assessing nanoparticle uptake is the cell model that is used. The most  
35 common method to assess nanoparticle uptake is in two-dimensional cell culture where cells are  
36 grown on plastic dishes. However, these 2D systems do not recapitulate the cellular micro- or  
37 macro-environment of solid tumors, and thus cannot effectively model the barriers faced by  
38 nanoparticles to reach their intended cell populations in the human body. Consequently, research  
39 has shifted to three-dimensional (3D) cellular models such as tumor cells grown as spheroids  
40 [9,10]. This is because 3D spheroids have been shown to emulate key cellular parameters  
41 associated with solid tumors (tissue heterogeneity, cell mechanics, nutrient and oxygen gradients)  
42 and have been shown to model tumor growth and drug response in a more realistic manner than  
43 2D cell cultures [11-13]. Tumor spheroids can also be augmented with additional cell types to add  
44 complexity and have unsurprisingly become a superior model to test fundamental nanoparticle  
45 characteristics [14-16]. However, current analysis of nanoparticle uptake in 3D spheroids has

46 primarily relied on fixed samples, using a range of *ex situ* techniques such as, flow cytometry,  
47 sectioning and immunostaining, and transmission electron microscopy [10,17-19]. A major  
48 limitation with these methodologies is a lack of quantitative power which retains both kinetic and  
49 spatial information, hindering effective comparisons of nanoparticle kinetics in different spheroid  
50 models. Other methods have been employed with moderate success; for example, time-of-flight  
51 mass spectrometry, and *in situ* immunostaining, sectioning and subsequent microscopy [18,20-  
52 22]. Unfortunately, these methods are not always readily accessible, often require substantial  
53 downstream labor, time, and expertise, and continue to use static tissue samples (usually fixed or  
54 embedded), thereby losing valuable kinetic information.

55 Developments in confocal microscopy have enhanced the visualisation of nanoparticles in  
56 spheroids with improved spatial and temporal resolution, and greater depth and less phototoxicity  
57 [23-25]. It has been increasingly applied to study nanoparticle uptake in these complex cellular  
58 models, however, quantitative analysis has remained largely rudimentary, using limited timepoints  
59 and linear profiling methods [23,26,27]. Recently, paired correlation or models of diffusion have  
60 been applied to examine accumulation or dynamic nanoparticle correlation, however their  
61 application in 3D cellular models has been limited [24,28,29]. In depth imaging analysis of  
62 nanoparticle kinetics in 3D cellular models that mimic the tumor microenvironment is essential to  
63 understand the impact of biophysical characteristics of nanoparticle design on therapeutic delivery  
64 but may also reveal cell-dependent impacts on nanoparticle uptake which were previously  
65 unknown.

66 Here we examined the spatial and temporal quantification of nanoparticle uptake by developing  
67 an accessible and rigorous method to evaluate nanoparticle penetration and uptake kinetics in 3D  
68 spheroids. Using confocal time-course data of nanoparticle uptake in live tumor spheroids, we

69 developed a quantitative and automated analysis pipeline for the Determination of Nanoparticle  
70 Uptake in Tumor Spheroids (DONUTS) which was used to determine how nanoparticle  
71 characteristics, in this case size, influence uptake kinetics into tumor spheroids of differing cellular  
72 origins *in situ*. This method is compatible with all major imaging platforms and is suitable for  
73 isotropic and anisotropic spheroids of varying cell types and complexity.

74 RESULTS

75 **Spheroid models of glioblastoma and neuroblastoma show different patterns of**  
76 **nanoparticle uptake**

77 To visualize nanoparticle uptake in live tumor spheroids, we first established spheroid models  
78 of glioblastoma (U87) and neuroblastoma (SK-N-BE(2)). Tumor spheroids were grown to sizes of  
79 approximately 500  $\mu\text{m}$  in diameter at Day 3 ( $505 \pm 18 \mu\text{m}$  and  $494 \pm 19 \mu\text{m}$  in U87 and SK-N-  
80 BE(2) respectively), as determined from spheroid growth curves (Supplementary Figure 1). This  
81 generated tumor spheroids which exhibited phenotypes of solid tumor growth including  
82 centralized cell death at the core and proliferative viability of peripheral cells (Supplementary  
83 Figure 2) [12,14]. Importantly, not only are the cancers from which these cell lines are derived of  
84 particular interest for nanoparticle delivery to improve patient outcome [30-32], but further, the  
85 tumor spheroids from these cell lines represent different cells of origin and show markedly  
86 different growth characteristics (Supplementary Figure 1). Brain cancer glioblastoma (U87) cell  
87 spheroids grew as regular (isotropic) neurospheres, akin to what has been reported in the literature  
88 [33,34], while in the pediatric peripheral nervous system cancer, neuroblastoma, (SK-N-BE(2)),  
89 spheroids grew with visual anisotropy and variability (Supplementary Figure 1).

90 To determine the impact of nanoparticle size on uptake, we selected a set of Sicastar®-redF  
91 silica nanoparticles (SiNP) of varying diameters (10, 30 and 100 nm) which met criteria for  
92 standardized reporting in bio-nano literature [35]. We initially validated that SiNP, which had no  
93 drug loading, showed no adverse effects on the viability of each cell line (Supplementary Figure  
94 3, Supplementary Figure 4). As 2D cultures are often known to be more sensitive to drug exposures  
95 than 3D spheroids [11,12], we corroborated this null result using a 2D resazurin-based assay and  
96 showed no impact on cell viability up to 100  $\mu\text{g} / \text{mL}$  and 72 hours exposure of U87 or SK-N-

97 BE(2) cells with nanoparticles alone, or in combination with live-compatible membrane dyes  
98 (Supplementary Figure 3, Supplementary Figure 4). Together, these results provided a foundation  
99 for the investigation of nanoparticle uptake into these two different tumor spheroid models.

100 For the visualisation of nanoparticle uptake over time, we embedded glioblastoma (U87) or  
101 neuroblastoma (SK-N-BE(2)) spheroids in 1% low melt agarose, to reduce movement while  
102 retaining 3D structure and viability, and imaged SiNP uptake at 30 minute intervals for a total of  
103 12 hours (Figure 1a). Confocal imaging demonstrated penetration of 30 nm silica nanoparticles  
104 into both glioblastoma and neuroblastoma spheroids (Figure 1). Interestingly, U87 glioblastoma  
105 spheroids appeared to exhibit lower uptake of SiNP (Figure 1b and Figure 1c) in contrast to SK-  
106 N-BE(2) neuroblastoma spheroids (Figure 1d and Figure 1e) over the 12 hour time-course. We  
107 also noted variable penetration of SiNP along the circumference of SK-N-BE(2) spheroids, likely  
108 related to the irregular shape of these 3D spheroids (Figure 1e), compared to U87 which showed  
109 consistent detectable fluorescence around the circumference of the spheroid (Figure 1c).



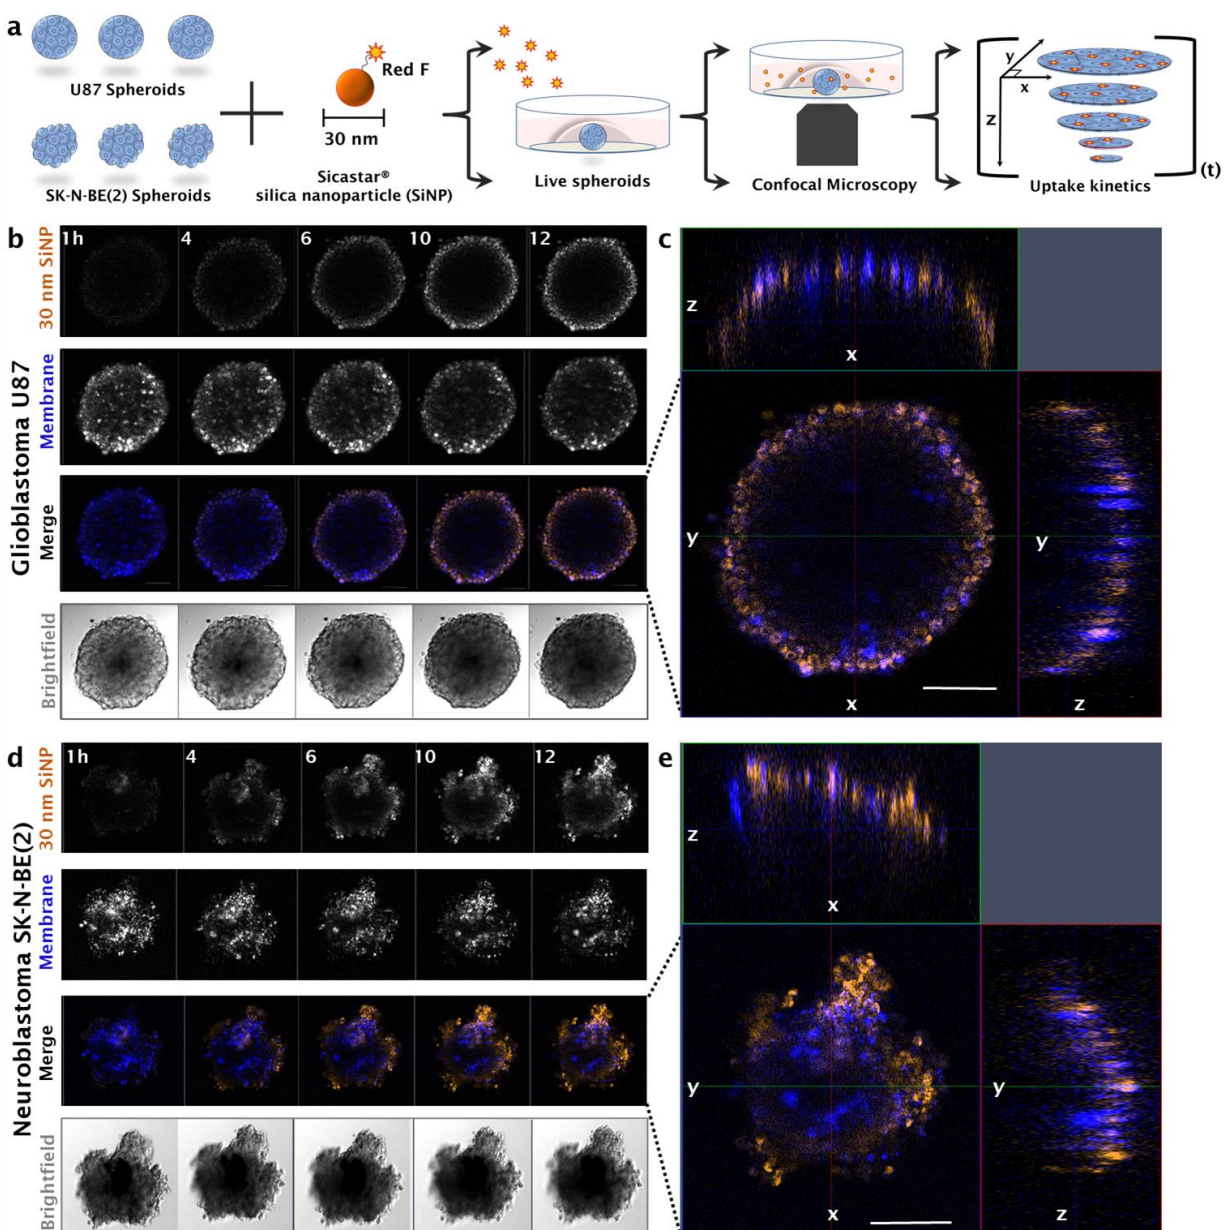

110  
111 **Figure 1. Visualisation of nanoparticle penetration into live glioblastoma (U87) and**  
112 **neuroblastoma (SK-N-BE(2)) tumour spheroids. (a)** Graphical diagram outlining preparation  
113 of spheroids for live imaging of nanoparticle accumulation using confocal microscopy in XYZ  
114 over time (t). **(b)** Accumulation of 30 nm silica nanoparticles (SiNP, orange) uptake at 1, 4, 6, 10,  
115 12 hours at the mid-plane (equator) of a glioblastoma (U87) spheroid labelled with a membrane  
116 dye (DiO, blue). **(c)** Representative image (n=3) of orthogonal data (XYZ) acquired at 12 hours  
117 post nanoparticle addition in U87. Scale bar, 100 μm. **(d)** Accumulation of 30 nm silica

118 nanoparticles (SiNP, orange) uptake at 1, 4, 6, 10, 12 hours at the mid-plane (equator) of a  
119 neuroblastoma (SK-N-BE(2)) spheroid labelled with a membrane dye (DiO, blue). (e)  
120 Representative image (n=3) of orthogonal data (XYZ) acquired at 12 hours post nanoparticle  
121 addition in SK-N-BE(2). Scale bar, 100  $\mu\text{m}$ .

## 122 **Development of a quantitative platform for the Determination of Nanoparticle Uptake in** 123 **Tumor Spheroids (DONUTS)**

124 After visualizing nanoparticle uptake in tumor spheroids, we turned to methodologies to analyse  
125 and evaluate this uptake in a quantitative manner. Initially, analysis was conducted using pre-  
126 established linear profiling methods to map fluorescence intensities along a defined vector in the  
127 mid-plane of the spheroid [23,26]. In this case we selected arbitrary angles for vectors at 0, 90 and  
128 270 degrees (Figure 2a and Figure 2c in U87 and SK-N-BE(2) respectively). Fluorescence from  
129 SiNP could be detected at 150  $\mu\text{m}$  from the core out to the circumference in U87 spheroids (Figure  
130 2b) and showed similar intensity profiles across the three linear vectors selected. In contrast, SiNP  
131 appeared to penetrate deeper in SK-N-BE(2) spheroids (Figure 2c) which was confirmed by  
132 detection of fluorescence intensities above background at 50 - 100  $\mu\text{m}$  from the core of SK-N-  
133 BE(2) spheroids (Figure 2d). In this case, the output from linear profiling was highly variable  
134 between different defined vectors, which introduced variability during analysis (Figure 2d).

135 To quantify uptake using all data available and thereby improve accuracy and reproducibility,  
136 nanoparticle fluorescence quantification was extended using a custom analysis platform in  
137 MATLAB (available in Supplementary Material) designed to calculate the average intensity along  
138 all defined radii in the mid-plane images (Figure 2a and Figure 2c), from the core of the spheroid  
139 to the spheroid circumference (Figure 2e). Using this script, we plotted average fluorescence  
140 intensities of SiNP at defined intervals (in this case, 10  $\mu\text{m}$ ). Automated iterative analysis on

141 subsequent time-points then enabled the quantification of nanoparticle uptake over time in U87  
142 and SK-N-BE(2) (Figure 2f and Figure 2g respectively).

143 To investigate whether this quantification changed when accounting for SiNP uptake throughout  
144 the spheroid, we extended our analysis to quantify nanoparticle penetration in 3D using all z-slice  
145 data. Analyses were therefore adjusted to calculate average nanoparticle fluorescence at a given  
146 radius,  $r$ , over all angles in 3D; termed the azimuth average (Figure 2h). This created the initial  
147 foundation for an automated and accessible analysis platform for the Determination of  
148 Nanoparticle Uptake in Tumor Spheroids (DONUTS) (full package and User Guide available in  
149 Supplementary Material). As part of DONUTS, users are prompted to load data, establish a binary  
150 mask to define boundaries of the tumor spheroid (using fluorescence data of labelled cells) and  
151 input basic parameters of experimental acquisition (pixel resolution, spheroid core, channel to be  
152 quantified etc.). In both cases in development (mid-plane and azimuth averaging), analysis  
153 required user defined selection of the core of the spheroid in XY or XY and Z. Selection was  
154 therefore repeated a minimum of three times per spheroid and the average of iterative results used  
155 for downstream analyses. Results from U87 (Figure 2i) and SK-N-BE(2) (Figure 2j) indicated  
156 good agreement between mid-plane averaging and 3D azimuthal averaging, with a larger average  
157 intensity of SiNP fluorescence in SK-N-BE(2) compared to U87 (maximum intensity values of 20  
158 RFU versus 10 RFU respectively). More detail on the step-by-step prompts in DONUTS can be  
159 found in the Supplementary User Guide, which has been included to assist application of this  
160 methodology platform.

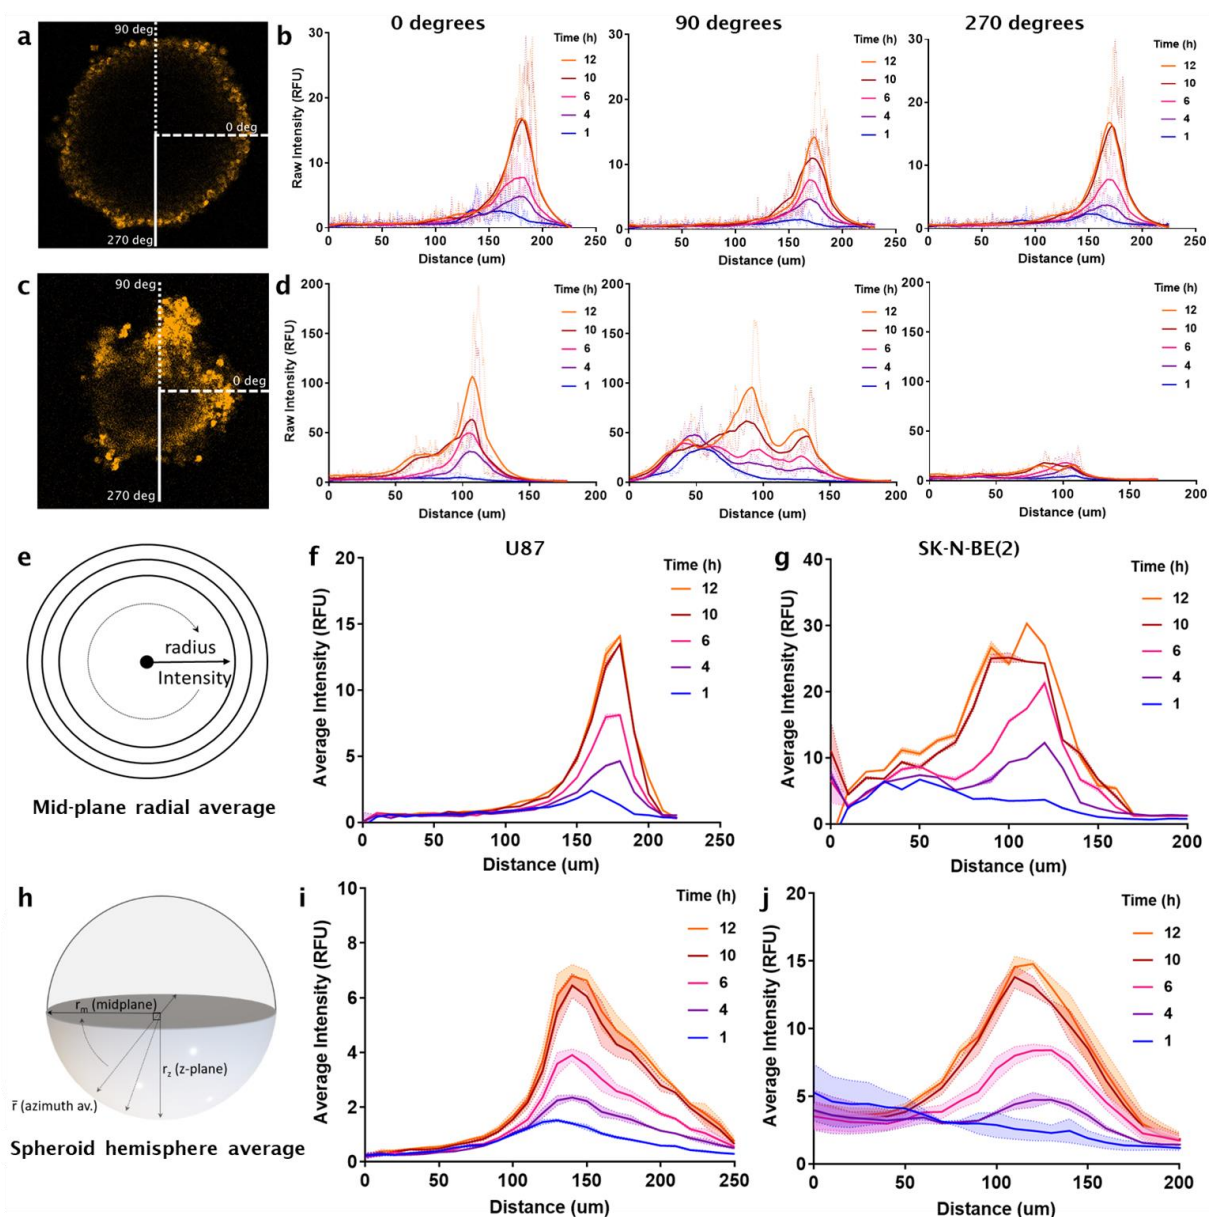

161  
 162 **Figure 2. Quantification of nanoparticle uptake in tumour spheroids**, from linear profiling to  
 163 azimuth (hemisphere) averaging. **(a)** Representative images of 30 nm silica nanoparticle (SiNP)  
 164 uptake in glioblastoma (U87) spheroid used for unidimensional linear profiling. **(b)** Plots of linear  
 165 intensity of 30 nm SiNP uptake along three angles (0, 90 and 270 degrees) (dotted line, dashed  
 166 line and solid line respectively in (a)). **(c)** Representative mid-plane image of 30 nm SiNP uptake  
 167 in neuroblastoma (SK-N-BE(2)) spheroid used for unidimensional linear profiling. **(d)** Plots of

168 linear intensity of 30 nm SiNP uptake along three angles (0, 90 and 270 degrees) (dotted line,  
169 dashed line, and solid line respectively in (c). Dark solid lines, LOWESS regression fit imposed  
170 over raw data. (e) Graphical depiction of radial averaging of SiNP fluorescence across the mid-  
171 plane of the spheroids in (a) and (c). This was used to quantify nanoparticle uptake every 10  $\mu\text{m}$   
172 over time across mid-plane in (f) U87 and (g) SK-N-BE(2) over time (1 – 12 hours). (h) Graphical  
173 depiction of radial averaging extended in 3D (the azimuth average) to quantify nanoparticle uptake  
174 across spheroid hemispheres. (i) Representative azimuth quantification of SiNP uptake every 10  
175  $\mu\text{m}$  in U87 and (j) SK-N-BE(2) over time (1 – 12 hours). RFU, relative fluorescence units. Lines,  
176 mean of three analysis iterations. Shaded range, SEM.

### 177 **Validation of azimuthal analysis using mathematically generated spheroid datasets**

178 However, even isotropic tumor spheroids like U87 showed variations in azimuth quantification  
179 profiles between replicate uptake experiments (Supplementary Figure 5), which was more  
180 pronounced in SK-N-BE(2) which grew with visual anisotropy (Supplementary Figure 5).

181 To determine whether this variation was related to the independent and biological nature of  
182 spheroids, and to further validate DONUTS as a reliable methodology for measuring nanoparticle  
183 uptake, we generated simulated spheroids with differing densities of cell “objects” and modelled  
184 particle uptake into these convolved spheroids under different particle diffusion parameters (Figure  
185 3). Parameters of particle diffusion used in simulations, included incremental probabilities of  
186 particle movement, which were also dependent on whether particles were intracellular ( $D(\text{in})$ ) or  
187 extracellular ( $D(\text{out})$ ) as they migrated through the simulated spheroids. Three separate  
188 simulations of the model were run with varying  $D(\text{in})$  (0.0001, 0.001 and 0.01  $\mu\text{m}^2\text{s}^{-1}$ ). This model  
189 operated with the assumption that  $D(\text{out})$  was orders of magnitude greater than  $D(\text{in})$  which is a  
190 reasonable assumption given that particles should move more freely outside of cells than inside

191 from spatial hindrance arguments alone. Results quantified using DONUTS demonstrated that  
192 particle diffusion through a “spheroid” with densely packed cell objects (High Density spheroid -  
193 HD) (Figure 3a) showed reduced penetration at low  $D(\text{in})$  ( $0.0001 \mu\text{m}^2\text{s}^{-1}$ , Figure 3b) compared to  
194 particle diffusion through a Low-Density (LD) spheroid with small cells (SC) (Figure 3c) which,  
195 with increased space for extracellular diffusion ( $D(\text{out})$ ), showed greater penetration across  
196 different intracellular diffusion coefficients (Figure 3d). Further, adjustment of the intracellular  
197 diffusion coefficient ( $D(\text{in})$ ), a proxy for changing all active mechanisms of particle uptake and  
198 intracellular trafficking, had a stepwise impact on particle diffusion, where increasing  $D(\text{in})$   
199 increased the azimuth measurements of particle uptake into both models (Figure 3c and Figure  
200 3d). A third spheroid (HDSC, Figure 3e) of high density like the HD spheroid (Figure 3a) but small  
201 cell (SC) objects like the LDSC spheroid (Figure 3c), was also investigated for penetration profiles  
202 that may appear intermediate due to equal density but an increased free surface area. Indeed, at  
203 low  $D(\text{in})$  ( $0.0001 \mu\text{m}^2\text{s}^{-1}$ ), profiles for the HDSC spheroid (Figure 3f) mimic that of the HD  
204 spheroid (Figure 3b), but as intracellular diffusion rates are increased, we observed greater  
205 penetration depth over time, approaching  $50 \mu\text{m}$  from the core at  $D(\text{in}) = 0.001 \mu\text{m}^2\text{s}^{-1}$ , and  
206 detectable particles at the core at  $D(\text{in}) = 0.01 \mu\text{m}^2\text{s}^{-1}$ .

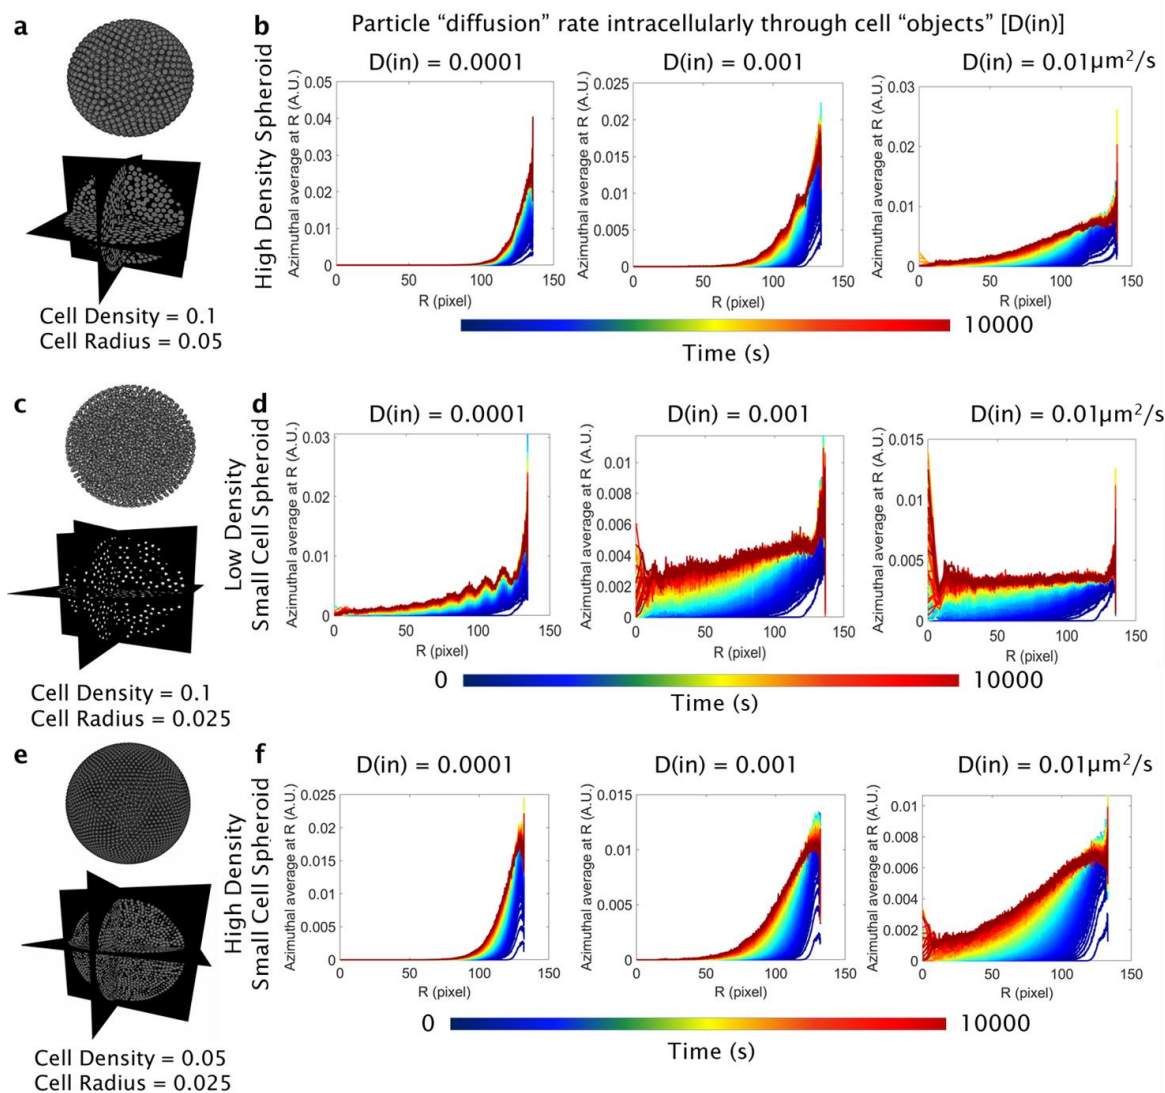

207

208 **Figure 3. Simulated modelling of particle movement through convoluted spheroids of**  
 209 **varying cell size and density** using MATLAB (2020a, custom scripts). **(a)** "High density" (HD)  
 210 convoluted spheroid of cell density 0.1 and cell radius 0.05 μm as a rendered 3D object, and  
 211 orthogonal projection. **(b)** Simulated particle "diffusion" through the HD spheroid in (a) over time  
 212 (10,000 s). Particle motion calculated at a fixed diffusion probability when moving extracellularly  
 213 between cell objects,  $D(\text{out}) = 0.1 \mu\text{m}^2\text{s}^{-1}$ , and variable diffusion rates internally through cell  
 214 objects,  $D(\text{in}) = 0.0001, 0.001, 0.01 \mu\text{m}^2\text{s}^{-1}$ . Analysis repeated for **(c)** "Low density Small Cell"  
 215 (LDSC) convoluted spheroid of cell density 0.1 and cell radius 0.025 μm as a rendered 3D object,

216 and orthogonal projection. **(d)** Simulated particle “diffusion” through the LD spheroid in (c) over  
217 time (10,000 s). Analysis repeated for **(e)** “High Density Small Cell” (HDSC) convoluted spheroid  
218 of cell density 0.05 and cell radius 0.025  $\mu\text{m}$  as a rendered 3D object, and orthogonal projection.  
219 **(f)** Simulated particle “diffusion” through the HDSC spheroid in (e) over time (10,000 s). Pixel  
220 size = 0.1  $\mu\text{m}$ .

### 221 **Quantitative *in situ* analysis of nanoparticle uptake in tumor spheroids are nanoparticle** 222 **size and tumor model dependent**

223 With our analysis methodology established, we next applied it to investigate the role of  
224 nanoparticle size (10 nm, 30 nm and 100 nm silica SiNP), in tumor spheroid accumulation [36].  
225 To further strengthen our study, we incorporated a third cell model using non-small cell lung  
226 cancer (H460) tumour spheroids which were validated as above (See Supplementary data).  
227 Nanoparticle uptake was imaged in live spheroids at 30 minute intervals across 12 hours.  
228 Representative maximum intensity projections of SiNP uptake at 1, 4, 6, 10 and 12 hours post  
229 addition in U87 (Figure 4a), SK-N-BE(2) (Supplementary Figure 7) and H460 (Supplementary  
230 Figure 8) suggested greater accumulation and penetration of 10 nm SiNP compared to 30 nm and  
231 100 nm SiNP (Figure 4, Supplementary Figure 7, Supplementary Figure 8). Orthogonal views  
232 confirmed retention of 3D shape in all spheroids (Figure 4b, Figure 4e, Figure 4g, Supplementary  
233 Figure 7, Supplementary Figure 8). Evaluation over the time-course (1 – 12 hours) suggested all  
234 three sizes of SiNP showed greater accumulation in SK-N-BE(2) spheroids, followed by U87 and  
235 then H460 spheroids. Of note, we observed variable fluorescence between independent biological  
236 replicates despite consistent imaging parameters (Supplementary Figure 6). This variability of  
237 fluorescence is likely a combined consequence of the fluorescence intensity and type of the



238 individual nanoparticles, as well as biological interactions of nanoparticles in each cell line. Thus,  
239 quantification by this method alone has limitations.

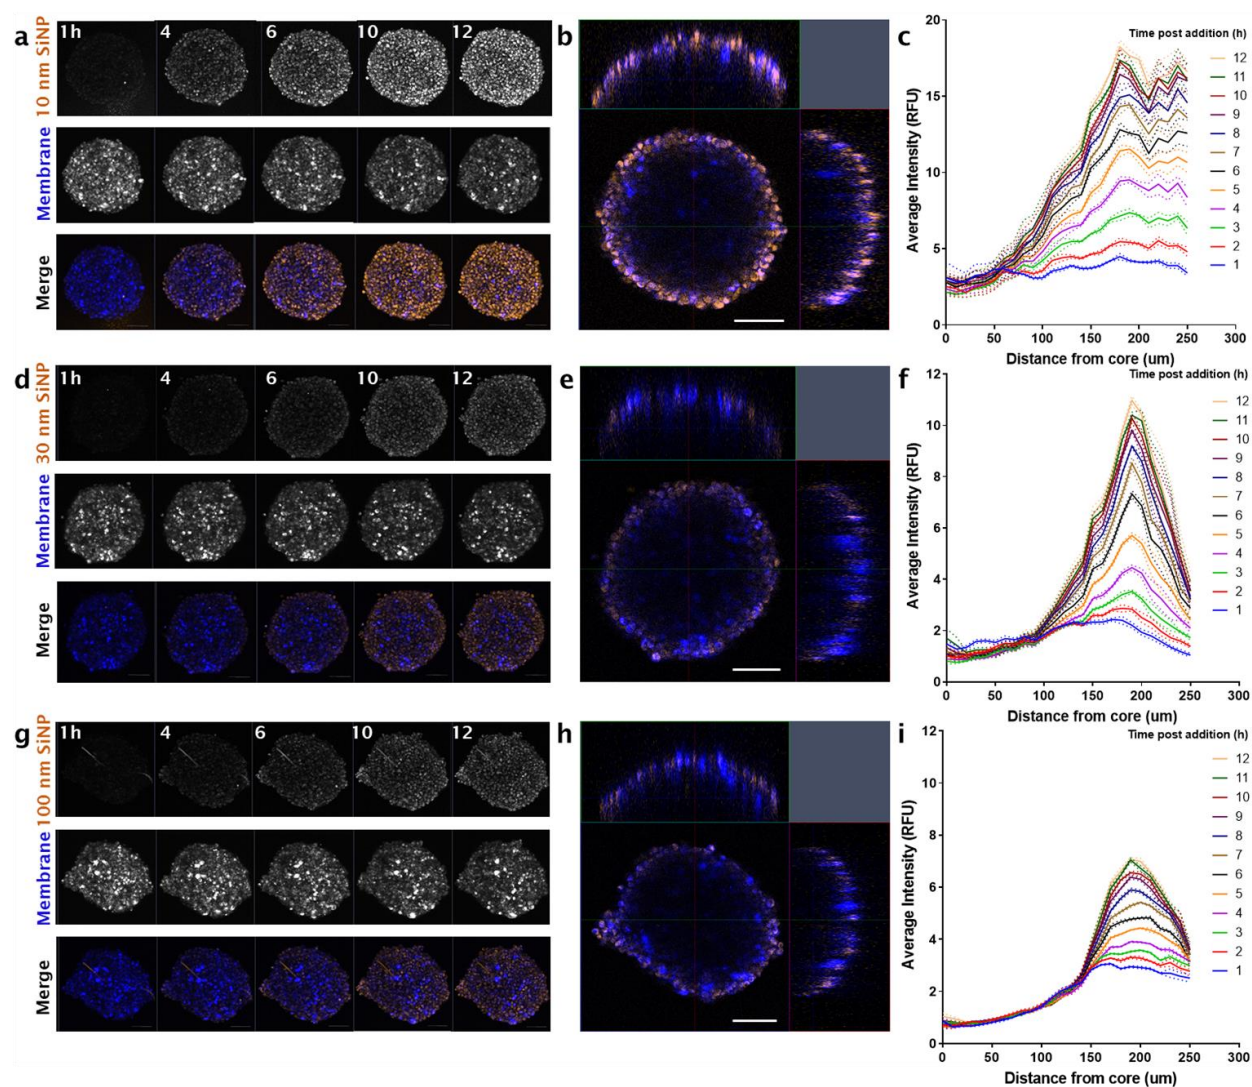

240  
241 **Figure 4. Silica nanoparticle (SiNP) uptake in glioblastoma (U87) tumour spheroids over**  
242 **time. (a)** Representative maximum intensity projections of 10 nm SiNP, membrane (DiO) and  
243 merge at 1, 4, 6, 10, 12 hours post addition (Orange, SiNP; Blue, Membrane). Z-stack images  
244 acquired using a Zeiss 880 confocal microscope (Fast Airy, sequential frame-fast laser excitation  
245 at 488 nm and 561 nm, 10X objective). **(b)** Orthogonal (XY, XZ, ZY) merge of U87 spheroid at  
246 six hours post SiNP addition, representative of n = 3. **(c)** Representative quantification of

247 nanoparticle uptake from the core of the spheroid to the circumference over time (1 – 12 h) with  
248 increased 10 nm SiNP penetration. Analysis conducted using a 3D azimuth averaging custom  
249 script, MATLAB (2020a). Workflow above was performed for 30 nm SiNP showing **(d)** maximum  
250 intensity projections over 1, 4, 6, 10, 12 hours post SiNP addition; **(e)** orthogonal merge at six  
251 hours and **(f)** azimuth quantification, respectively. Imaging and analysis also performed for 100  
252 nm SiNP in panels **(g)** maximum intensity projections; **(h)** orthogonal merge at six hours and **(i)**  
253 quantification of 100 nm SiNP uptake. Lines, mean of  $n=3$  analysis iterations. Dotted lines, SEM.  
254 Scale bar, 100  $\mu\text{m}$ .

### 255 **Differences in nanoparticle penetration kinetics revealed via mathematical modelling**

256 To evaluate whether silica nanoparticles did indeed show increased uptake in neuroblastoma  
257 (SK-N-BE(2)) spheroids compared to glioblastoma (U87) or NSCLC (H460) spheroids, we used  
258 the output of DONUTS azimuthal quantification to calculate the penetration kinetics  
259 (diffusivities), for each type of nanoparticle and tumor cell model considered. Penetration kinetics  
260 are independent to maximum fluorescence and used to transform the azimuth quantification into a  
261 rate of fluorescence change relative to distance through the spheroid. One approach to determine  
262 penetration kinetics is based on a forward-in-time, center-in-space (FTCS) diffusion model, often  
263 used to measure the mobilities of molecules in fluorescence recovery after photobleaching (FRAP)  
264 microscopy (Figure 5a) [37,38]. FTCS when applied in FRAP is a measure of the recovery of  
265 fluorescence inside a bleached area of a cell, which depends on the molecular motility of the  
266 fluorescent compound of interest and is one of the standard approaches to measure diffusion  
267 coefficients in live cell microscopy. In these experiments, we assumed that increases in  
268 fluorescence, due to nanoparticle penetration, within a sphere of radius  $r$  from spheroid center,  
269 would follow a similar trend to that observed in FRAP experiments. By monitoring the rise in

270 average intensity within a sphere of radius  $r$  over time, we can extract the diffusivity at this radius  
271 from the spheroid center. Results demonstrated an average 10-fold increase in diffusion rates in  
272 10 nm nanoparticles compared to 30 nm and 100 nm in our independent tumor spheroid models  
273 (Figure 5b and Figure 5d for U87 and H460 respectively). However, the diffusion coefficient from  
274 FTCS relies on multiple assumptions which inherently violated the biological dynamics we  
275 measured, including assumptions of a constant rate of particle diffusion (*i.e.*, that nanoparticle  
276 uptake kinetics do not change with radial distance) and assumptions of Gaussian fluorescence  
277 profiles, making it a simplified model of particle diffusion [38-40]. Evidence suggested that  
278 biological data deviated from this diffusion equation as nanoparticle fluorescence intensities  
279 dropped towards the core of both spheroid models, resulting in poor fit in diffusion kinetics <100-  
280 150  $\mu\text{m}$  from the core (Supplementary Figure 9). This aligned with the large error ranges seen to  
281 the left of the dotted lines in Figures 5b – 5d, which corresponded with a drop in the adjusted  $R^2$   
282 value between the fit of the data to the calculated FTCS diffusion coefficient (Supplementary  
283 Figure 9). This diffusion coefficient was also unable to distinguish differing diffusion rates of  
284 nanoparticles in irregular SK-N-BE(2) spheroids, despite clear trends in visual data and azimuthal  
285 quantification.

286 To address this deviation and generate an improved kinetic equation for the data, a data-driven,  
287 mathematical model of diffusion was designed using MATLAB (script and guide available in  
288 Supplementary Material) and applied to quantify penetration kinetics across different  
289 nanoparticles and between different tumor spheroid models (Figure 5e). This method utilized the  
290 biological azimuth data as input and then calculated the numerical solution to a radially dependent  
291 diffusion equation in both space and time. Results confirmed a stepwise decrease in diffusivity as

292 nanoparticle size increased, *i.e.*, 10 nm SiNP showed the greatest penetration kinetics compared to  
293 30 nm and then 100 nm SiNP (Figures 5f - 5h).

294 Further, all three nanoparticles showed greater diffusivity in SK-N-BE(2) spheroids with  
295 penetration kinetic curves starting less than 150  $\mu\text{m}$  from the spheroid core. This contrasted with  
296 U87 spheroids which showed penetration kinetic curves arising only above 150  $\mu\text{m}$  from the  
297 spheroid core, indicative of negligible uptake below this distance. In contrast, nanoparticles  
298 showed differing trends in H460 spheroids, with a significant decrease in uptake kinetics of 30 nm  
299 compared to U87 spheroids, and both 30 nm and 100 nm particles when compared to the uptake  
300 kinetics in SK-N-BE(2) spheroids (Figure 5g and Figure 5h).

301

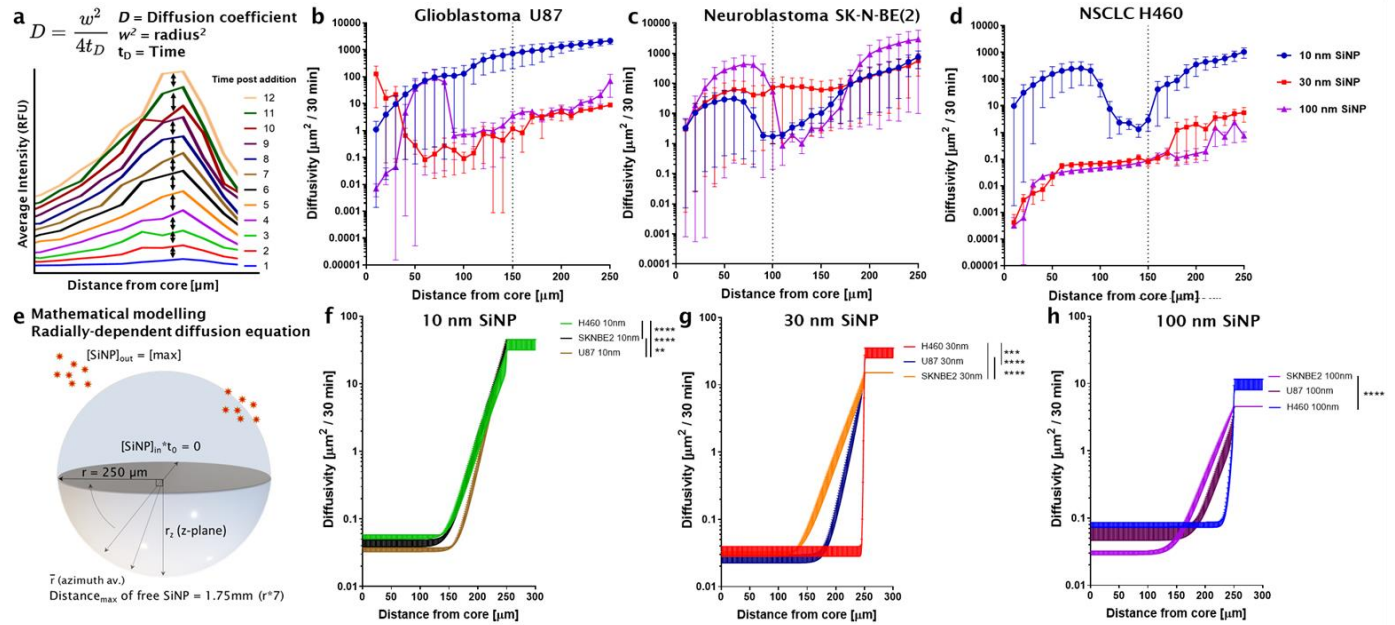

302

303 **Figure 5. Calculation of penetration kinetics of silica nanoparticles (SiNP) in tumour**

304 **spheroids. (a)** Using output from 3D azimuth averaging, penetration kinetics of nanoparticles was

305 quantified. Initial calculations used the diffusion coefficient based on a forward-in-time, center-

306 in-space (FTCS) diffusion model. **(b)** Penetration kinetics of SiNP in glioblastoma (U87), **(c)**

307 neuroblastoma (SK-N-BE(2)) and **(d)** non-small cell lung cancer (H460) calculated according to

308 assumptions for a FTCS diffusion coefficient  $n=3$  mean  $\pm$  SEM. **(e)** Extension to a custom

309 algorithm to model nanoparticle penetration kinetics. This was achieved by calibrating the

310 numerical solution to a radially dependent diffusion equation to the fluorescence data in both space

311 and time. **(f)** Penetration kinetics of 10 nm SiNP, **(g)** 30 nm SiNP and **(h)** 100 nm SiNP

312 nanoparticles across U87, SK-N-BE(2) and H460 spheroids ( $n=3$ ) using mathematical modelling

313 and derived diffusion fitting. Significance between groups as indicated, \*\*  $p < 0.01$ , \*\*\*  $p < 0.001$ ,

314 \*\*\*\*  $p < 0.0001$ , Unpaired t-test with Welch's correction.

315 **Differing nanoparticle diffusion kinetics may be impacted by cell stiffness and spheroid**  
316 **densities**

317 From simulations of nanoparticle diffusion in convolved spheroids (Figure 3), we observed that  
318 decreasing spheroid density resulted in increased particle penetration. Given trends of increased  
319 nanoparticle uptake in SK-N-BE(2) spheroids compared to U87 or H460 spheroids, we  
320 investigated whether this was associated with spheroid cell density, using spheroids which were  
321 chemically fixed and cleared, stained with DAPI and imaged using Lightsheet microscopy. We  
322 examined nuclei density of U87 using manual and automated nuclei detection (Figure 6a and  
323 Figure 6b). Automated nuclei detection was conducted using 3D feature finding [41] in MATLAB  
324 (representative in Figure 6c) to calculate nearest neighbor distances (NND). Automated detection  
325 of nuclei was then quality checked against manual counts across three z-stacks per spheroid, with  
326 tolerated variance defined at less than 7.5%. Nuclei were partitioned by distance from the core and  
327 showed a trend of increasing density towards the core of U87 spheroids, as measured by the  
328 reduced distribution of nearest neighbor distances (NNDs) between nuclei (Figure 6d).  
329 Interestingly, when the median cell diameter for U87 was overlaid on cell density data (Figure 6g),  
330 it appeared that cells within the tumour spheroid were more condensed, where the median distance  
331 between cells was in fact less than the median diameter of U87 single cells in suspension ( $19.05 \pm$   
332  $0.66 \mu\text{m}$ , Supplementary Table 1). The same analysis was applied to SK-N-BE(2) spheroids with  
333 manual (Figure 6e) and automated cell counts (Figure 6f), 3D feature finding (Figure 6g) and NND  
334 relative to median cell diameter (Figure 6h). As anticipated, distances between cells in SK-N-  
335 BE(2) spheroids were greater than the median cell diameter ( $12.16 \pm 0.54 \mu\text{m}$ ). Further analysis in  
336 H460 showed a similar trend to that of U87, with greater cell density where the NND of each  
337 neighboring cell was less than the median diameter of H460 cells in suspension ( $15.64 \pm 0.11 \mu\text{m}$ )

338 (Figure 6i, Figure 6j, Figure 6k and Figure 6l). However, the cell density of H460 spheroids,  
 339 relative to the average cell diameter, was less than that of U87, indicating that U87 spheroids may  
 340 have been expected to display the lowest nanoparticle uptake kinetics, if relying on spheroid  
 341 density alone.

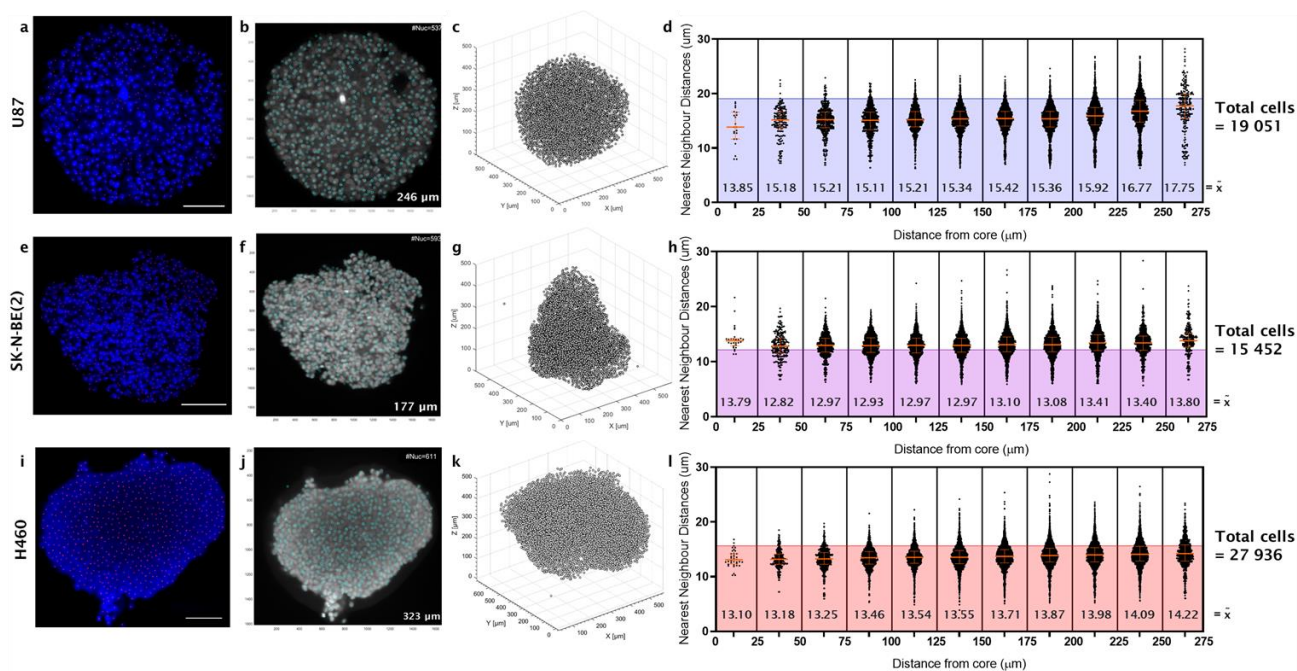

342

343 **Figure 6. Density of nuclei in glioblastoma (U87) compared to neuroblastoma (SK-N-BE(2))**  
 344 **and NSCLC (H460) spheroids**, prepared using optical clearing and imaged with lightsheet  
 345 microscopy. **(a)** Glioblastoma (U87) spheroid which was fixed and optically cleared for nuclei  
 346 localization using DAPI. Representative of  $n = 3$ . **(b)** Nuclei were detected using 3D feature  
 347 finding in MATLAB (2020a, custom script adapted from [41]) and validated against manual  
 348 counts in (a). **(c)** Nuclei coordinates in MATLAB were then used to calculate nearest neighbor  
 349 distances (NND). **(d)** NND plotted at 25  $\mu\text{m}$  intervals from the core to the circumference. This  
 350 was repeated in neuroblastoma (SK-N-BE(2)) spheroids with **(e)** manual counts, **(f)** automated  
 351 segmentation and **(g)** reconstructed spheroids for NND ( $n = 3$ ) and **(h)** plotted NND. The same is  
 352 then presented for NSCLC (H460) spheroids with **(i)** manual counts, **(j)** automated segmentation

353 and **(k)** reconstructed spheroids for NND ( $n = 3$ ) and **(l)** plotted NND. Scale bar in panels (a), (e)  
354 and (i), 100  $\mu\text{m}$ . NND Plots in panels (d), (h) and (l): Orange lines, median with interquartile range  
355 across  $n=3$  segmented spheroids per cell model. Shaded area behind data presents median cell  
356 diameter of cells in suspension (19.05, 12.16 and 15.64  $\mu\text{m}$ , for U87 (blue) and SK-N-BE(2)  
357 (purple) and H460 (red) respectively). Median NND values ( $\bar{x}$ ) are given for every 25  $\mu\text{m}$  interval  
358 from the spheroid core.

359 Finally, we investigated whether nanoparticle kinetics was associated with differences in the cell  
360 stiffness between the tumour spheroid models. Here, we employed force imaging cytometry to  
361 evaluate the stiffness and deformation of single cells from each tumour type (Supplementary  
362 Figure 10 and Supplementary Figure 11). Interestingly, H460 cells were significantly stiffer with  
363 a higher Young's Modulus (1.56 kPa) compared to U87 (1.04 kPa) or SK-N-BE(2) (0.88 kPa)  
364 ( $p < 0.01$ , Supplementary Figure 10). H460 cells also had the lowest deformation potential  
365 ( $0.022 \pm 0.001$ ) versus SK-N-BE(2) ( $0.033 \pm 0.004$ ) or U87 cells, the latter which showed  
366 significantly higher deformation potential ( $0.056 \pm 0.001$ ) compared to H460 or SK-N-BE(2) cells  
367 ( $p < 0.01$ , Supplementary Figure 11). Collectively, this rigorous quantitative data analysis of  
368 nanoparticle uptake kinetics, using the DONUTS analysis platform, showed that nanoparticle  
369 penetration kinetics may be influenced not only by particle size, but also the cell density and  
370 stiffness of the tumor spheroid model.



371 DISCUSSION

372 Here we developed an imaging and analysis approach for the Determination of Nanoparticle  
373 Uptake in Tumor Spheroids, termed DONUTS. This method does not require stable expression of  
374 a fluorescent marker protein in cells, immunostaining or IHC, and can be conducted using confocal  
375 microscopes with iterative or temporal data. It is designed to be accessible to users of broad  
376 disciplines (chemistry, biology, cancer research), capturing live cell uptake and compatible with  
377 various microscopy data formats and archival datasets. We applied DONUTS to investigate the  
378 impact of nanoparticle size on uptake and penetration kinetics of diverse 3D spheroid models,  
379 benchmarking an accessible and rigorous method to evaluate the effect of nanoparticle  
380 characteristics and cell model on penetration kinetics. Our findings revealed that nanoparticle  
381 uptake in live tumour spheroids was impacted by particle size, cell type, cell stiffness and density  
382 of the spheroid model.

383 As the current benchmark for *in situ* fluorescence measurements from visual data, linear  
384 profiling has benefits as an easily accessible, non-laborious analysis tool. However, quantification  
385 of nanoparticle uptake using this method was shown here to be heavily dependent on the vector  
386 selected, a known criticism of the technique [19,26,29]. Previous studies have moved to using  
387 multiple linear vectors to establish an intensity profile, however this adds manual labor and  
388 continues to exclude spatial data [29]. Variation in results by linear profiling methods may be  
389 attributed to the variability in fluorescence in any given z-plane, or an influence of the biological  
390 model itself, such as spheroids which deviate from isotropy as we have shown here in the  
391 neuroblastoma SK-N-BE(2) spheroids. In an isotropic spheroid model, such as glioblastoma  
392 (U87), our data suggests it may be sufficient to quantify nanoparticle uptake in a single z-plane,  
393 on the proviso that the plane selected is the equatorial (mid-)plane of the spheroid. U87 cells are

394 well regarded as models which form tightly packed and isotropic spheroids [33,34] which was  
395 ideal for establishing our analysis platform. In contrast, in SK-N-BE(2), and in primary patient  
396 tumor samples, this same isotropy was not observed when cells were grown as spheroid cultures  
397 [42-44]. This can become increasingly common with the addition of multiple cell types  
398 (fibroblasts, endothelial cells, macrophages) and the formation of complex tumor organoids [44-  
399 46], necessitating analysis that incorporates all spatial and temporal information, that DONUTS  
400 provides.

401 Additionally, irrespective of isotropy, the outcome of linear profiling is the same: namely that  
402 much of the visual data acquired is discarded, and objective comparisons of different nanoparticles  
403 in different spheroid models become difficult. This undermines the applicability of linear profiling  
404 for effectively and reliably comparing nanoparticle designs for improved tumor penetration and  
405 uptake. This has been supported by previous studies which have highlighted the importance of a  
406 higher sample number to ensure reliability or moving to kinetic quantification as a means for more  
407 robust spatial analysis [21,24,29]. However, increasing sample number can quickly become labor-  
408 and cost-intensive for the in-depth quantification and comparison of nanoparticle penetration and  
409 uptake kinetics within these tumor models.

410 Thus, we focused on an *in situ* and automated method to evaluate nanoparticle uptake within  
411 spheroids, which retains temporal resolution and incorporates all accessible spatial information  
412 [19,47,47]. In establishing DONUTS, the application of automated, 3D radial averaging (azimuth  
413 averaging) enabled objective quantification of nanoparticle uptake in live spheroids over a 12-hour  
414 time course with single cell spatial resolution (10  $\mu\text{m}$ , from the core to the circumference) and  
415 demonstrated the capacity of DONUTS to quantify nanoparticle penetration *in situ*, without any  
416 bias of manually defined vectors.

417

418 While DONUTS enabled effective quantification of nanoparticle uptake in our diverse tumor  
419 spheroid models, ultimately evaluation between models and different nanoparticles was still  
420 influenced by variations in fluorescence intensity profiles. Thus, we applied the output of  
421 DONUTS as the input data for calculating nanoparticle kinetics, effectively normalizing  
422 fluorescence for a direct comparison of nanoparticle uptake between spheroid models. Calculating  
423 the penetration kinetics of nanoparticles in cancer spheroids or organoids is an important step  
424 towards robust evaluation of nanoparticle uptake and falls under the drive toward consistent and  
425 reproducible reporting in bio-nano literature, for the direct comparison of nanoparticle designs  
426 between different studies [19,35]. We further validated the nanoparticle kinetic findings by  
427 incorporating mathematical modelling into our analysis, which has previously been used to  
428 investigate how nanoparticle characteristics influence cell uptake, or how tumor spheroid  
429 development may impact drug delivery, both in a high throughput and iterative manner [48-51].  
430 Mathematical modelling independently validated DONUTS quantification of particle uptake with  
431 known diffusion properties in simulated spheroids of differing cell densities. We also applied a  
432 computational model to our analysis of nanoparticle uptake kinetics, using a model of radial-  
433 dependent nanoparticle diffusion informed by biological data. This generated enhanced fit and  
434 kinetic curves which were used to directly evaluate the uptake of different nanoparticles in tumor  
435 models of independent and diverse cell types. This has the capacity to be expanded to facilitate  
436 rapid analysis of biologically complex tumor models and drug loaded nanoparticles of varying  
437 designs. Our modelling confirmed that an increase in nanoparticle penetration inversely correlated  
438 with nanoparticle size, where 10 nm silica particles showed the greatest uptake kinetics compared  
439 to 30 nm and 100 nm particles, respectively. While the influence of nanoparticle size on uptake is  
440 well accepted [52-55], we also demonstrated that nanoparticle penetration in 3D appeared to be

441 tumor model dependent. Silica nanoparticles showed greater uptake in SK-N-BE(2) compared to  
442 U87 and again to H460 spheroids at all particle sizes, suggesting the spheroid model has intrinsic  
443 properties which will influence nanoparticle delivery efficiency. Glioblastoma and NSCLC  
444 spheroids were highly compact, such that measurements of free space between adjacent nuclei  
445 were negligible, and showed evidence of cell crowding [43,56], potentially resulting in changes in  
446 cell size towards the core. In contrast, neuroblastoma spheroids held consistent and detectable free  
447 space throughout the model, which agreed with simulated low density spheroid data and may have  
448 contributed to increased nanoparticle uptake kinetics. We also showed that NSCLC cells had a  
449 greater stiffness and lower deformation potential compared to glioblastoma or neuroblastoma;  
450 characteristics of solid tumors which have been shown to hinder nanoparticle delivery in the past  
451 [3,57-60]. While we identified changes in cell stiffness and cell density in these spheroid models,  
452 there are of course several mechanisms of uptake (including active transport and transcytosis)  
453 which may also contribute to differential nanoparticle penetration kinetics and can now be  
454 evaluated using these methodologies in future studies [60]. Our analysis also identified differences  
455 in nanoparticle kinetics at the core of both spheroid models. A stark reduction in diffusivity of  
456 silica nanoparticles occurred at approximately 100 - 150  $\mu\text{m}$  from the spheroid core for the 30 and  
457 100 nm particles. Penetration depth of nanoparticles is an under studied measurement which is  
458 clinically relevant, as penetration and subsequent cell uptake will ultimately dictate nanoparticle  
459 efficacy [61]. For instance, Manzoor *et al*, demonstrated that Doxil has a penetration distance of  
460 less than 20  $\mu\text{m}$  which could be increased to 78  $\mu\text{m}$  with mild hyperthermia for enhanced efficacy  
461 [62]. Further, numerous studies have used fluorescence data of penetration to support the  
462 progression of nanoparticle designs for further clinical testing [10,26,52,63].

463 CONCLUSION

464 Our study has shown that the spatial and temporal analysis of nanoparticle uptake kinetics are  
465 impacted by cell type, cell stiffness and density of the spheroid model. This was achieved by our  
466 development of a quantitative analysis tool to effectively evaluate the impact of nanoparticle  
467 characteristics on penetration kinetics into live tumor spheroids *in situ*. This method provides an  
468 accessible and robust quantitative platform, complete with proof-of-concept study and user support  
469 documents that will be valuable to facilitate analysis and advance the understanding and  
470 development of nanoparticle designs for enhanced clinical translation.

471

472        **METHODS**

473        **Nanoparticles**

474        Sicastar®-F red fluorescent silica nanoparticles were purchased from Micromod  
475        Partikeltechnologie GmbH (Germany) in sizes of 10 nm, 30 nm, and 100 nm with unmodified  
476        surface coatings. Specifications have been included in supplementary documents. Peak  
477        fluorescence excitation and emission for these particles are reported to be 569 / 585 nm,  
478        respectively. Fluorescence spectra and size distributions were confirmed using fluorometry on a  
479        Synergy Neo2 HTS Multi-Mode Microplate Reader (BioTek, USA) and DLS on a Zetasizer Nano  
480        (Malvern Panalytical, UK), respectively.

481        **Cell culture**

482        U87 glioblastoma (ATCC HTB-14) and SK-N-BE(2) neuroblastoma (ATCC CRL-2271) were  
483        cultured in Dulbecco's Modified Eagles Medium (DMEM) (Sigma-Aldrich, Australia)  
484        supplemented with 10% fetal bovine serum (FBS) (Life Technologies, Australia). H460 NSCLC  
485        (HTB-177) were cultured in Roswell Park Memorial Institute (RPMI) media (Sigma-Aldrich,  
486        Australia) supplemented with 10% fetal bovine serum (FBS) (Life Technologies, Australia). Cells  
487        were passaged at 70 – 90% confluency using 1% PBS and trypsin/EDTA (0.25%,0.02%) in T75  
488        tissue culture flasks (Merck, Australia) and cultured at 37°C, 95% humidity and 5% CO<sub>2</sub>. Cells  
489        were cultured to a maximum of 32 passages or three months. For SK-N-BE(2) as a semi-adherent  
490        cell line, suspended and adherent cells were collected. All cell lines were tested regularly and found  
491        to be free of mycoplasma.

492        **Cell viability studies**

493        Toxicity of Sicastar® nanoparticles was investigated in 2D cell culture using a modified Alamar  
494        Blue cytotoxicity assay [64]. In brief, glioblastoma U87 and neuroblastoma SK-N-BE(2) cells

495 were seeded at  $2 \times 10^3$  cells / 100  $\mu$ L / well in transparent 96-well plates (Interpath Services,  
496 Australia) in DMEM + 10% FBS. NSCLC H460 cells were seeded at  $7 \times 10^2$  cells / 100  $\mu$ L / well  
497 in RPMI + 10% FBS. After 24 hours, silica nanoparticles were added at concentrations of 1, 10 or  
498 100  $\mu$ g / mL with or without membrane dye, DiO (1  $\mu$ M). Doxorubicin (Sapphire Bioscience,  
499 Australia; 0.1 - 0.25  $\mu$ M) was used as a positive control for the assay. After 72 hrs, 20  $\mu$ L of  
500 resazurin blue reagent (Sigma) was added to each well and incubated for a further 6 – 12 hrs for  
501 reduction by active mitochondria, before spectrophotometry at 470-495nm using a Benchmark  
502 Plus Microplate Reader (BioRad, USA). 3D toxicity of silica nanoparticles was investigated in  
503 glioblastoma, neuroblastoma and NSCLC spheroids using a CellTiter Glo Assay (Promega, USA).  
504 In brief, cells were incubated with or without membrane dye (DiO, 1  $\mu$ M; Thermofisher Scientific,  
505 Australia) for 15 minutes before centrifugation (1200 rpm, 3 minutes) and resuspension in DMEM  
506 + 10% FBS. Cells were then seeded at  $2 \times 10^3$  cells / 200  $\mu$ L / well, ( $8 \times 10^2$  cells for H460) in  
507 ultra-low adherent round-bottom 96-well plates (Lonza, Australia) for a total of 72 hours.  
508 Doxorubicin (20 - 50  $\mu$ M) was added 24 hours post seeding, and silica nanoparticles (SiNP; 10,  
509 30, 100 nm) added (100  $\mu$ g / mL) in triplicate to spheroids with or without DiO, 48 hours post  
510 seeding. At 72 hours, spheroids were transferred in 50  $\mu$ L total volume to white flat-bottom 96-  
511 well plates in triplicate. Media controls were used per each condition in duplicate. An ATP  
512 standard curve was also pipetted in duplicate using 10 mM ATP (Life Technologies, Australia)  
513 diluted in DMEM + 10% FBS to a range of 0.3125  $\mu$ M – 10  $\mu$ M. CellTiter Glo reagent (Promega)  
514 was added at 1:1 ratio and plates transferred to an Orbit 4 Benchtop shaker (60 rpm, 30 minutes).  
515 ATP concentrations were then measured using 1.0 second luminescence exposure on a Wallac3  
516 Victor plate reader (PerkinElmer, USA). For the live/dead assay, U87, SK-N-BE(2) or H460 cells  
517 were seeded at densities mentioned above in ultra-low adherent round-bottom 96-well plates

518 (Lonza) for 72 hours. For EtOH treated controls, 100 uL of 70% EtOH was added to spheroids 1  
519 hour prior to embedding. Spheroids were then washed twice with PBS to remove esterase activity  
520 from residual FBS. Spheroids were then gently embedded in sterile, molten 1% low-melt agarose  
521 (Sigma) in glass-bottom 24-well plates (Cellvis LLC). These were then treated with 10  $\mu$ M  
522 Ethidium Homodimer-1 and 5 uM Calcein AM from a Live/Dead Test Kit (Molecular Probes,  
523 ThermoFisher Scientific) to a total volume of 250 uL PBS and incubated (37°C, 95% humidity and  
524 5% CO<sub>2</sub>) for 30 minutes. Spheroids were then imaged on a Zeiss Celldiscoverer 7 with a 5X/0.35  
525 Plan-Apochromat objective and 2X Tubelens Optovar. Images were acquired with 0.457  $\mu$ m to  
526 pixel scale in XY and 2.8  $\mu$ m to pixel scale in Z, in three channels sequentially with  
527 394/490/573/691 beam splitters (Channel 1: LED-module 470 nm, 6.45%, 134 ms exposure,  
528 emission 514 LP; Channel 2: LED-module 567 nm, 50.05%, 500 ms exposure, emission 617 LP;  
529 Channel 3: Brightfield TL LED Lamp, 0.10%, 4 ms exposure). Images were exported to Zen Black  
530 (2.1 SP3, Zeiss), processed to normalize channel intensities relative to EtOH treated controls and  
531 then exported as TIFF files.

### 532 **Confocal microscopy: spheroid preparation and image acquisition**

533 For live confocal experiments, cells were pre-stained with DiO (Sigma Aldrich) (1 uM, 15  
534 minutes, 1200 rpm, 3 minutes) or left unstained. These cells were then seeded at densities as above  
535 in ultra-low adherent round-bottom 96-well plates (Lonza) for 60 hours. Spheroids (with or  
536 without DiO) were then gently embedded in sterile, molten 1% low-melt agarose (ThermoFisher  
537 Scientific) in glass-bottom 24-well plates (Cellvis LLC). Phenol red free media + 10% FBS was  
538 added to all wells for imaging. For nanoparticle uptake, nanoparticles were diluted in phenol red  
539 free media to 40 ug / mL. These solutions were then added to wells with spheroids (stained with  
540 or without DiO) at a 1:1 dilution to a final concentration of 20 ug / mL in 500 uL PBS (500 uL)



541 was added to outer wells to reduce evaporation and drift during imaging. Additional untreated  
542 spheroids (with or without DiO) were used as controls.

543 Imaging was conducted in Zen Black 2.3 SP1 (Zeiss, Germany) on a Zeiss LSM 880 inverted  
544 laser scanning confocal microscope equipped with a FAST Airy scan detector and incubation  
545 (37°C, 5% CO<sub>2</sub>). Acquisition was carried out using a Plan-Apochromat 10x/0.45 M27 objective,  
546 zoom of 1.5 to 1.7 times, maximum scan speed, and pixel arrays of 1292 by 1292 to 1528 by 1528.  
547 Acquisition setup was maximized for resolution but prioritized for time (30-minute acquisition  
548 window) to capture temporal fluorescence using frame-fast Airy with two channels simultaneously  
549 (Channel 1: 488 nm, 15% laser; Channel 2: 561 nm, 20% laser), 488/561/633 beam splitters and  
550 495-550 BP/ 570 LP filters. Spheroid positions were saved, and the acquisition acquired z-stacks  
551 (optical section thickness 1.535  $\mu\text{m}$ ) from the core to the circumference (one hemisphere, up to  
552 270  $\mu\text{m}$ ) every 30 minutes for a total of 24 acquisitions (total 12 hours). Raw data was saved and  
553 exported to Zen Black (2.1 SP3, Zeiss, Germany) for 3D Airy processing (automatic strength of  
554 6.0) before post-processing for maximum intensity projections, orthogonal images, and subsequent  
555 analyses.

#### 556 **Azimuth averaging and nanoparticle quantification by diffusion.**

557 Analyses (mid-plane, 3D azimuth and diffusion) were conducted using custom scripts in  
558 MATLAB (R2020a, MathWorks, Natick, USA) which built upon previous methods [29]. These  
559 are included with user friendly comments (%%) in Supplementary files, and are supported by a  
560 User Guide, also in the Supplementary.

561 In brief, midplane radial averaging was calculated from a user defined coordinate for the center  
562 of the spheroid. The membrane channel was used to create a binary mask and define the  
563 circumference of the spheroid at each time point. Radii were then defined pixel per pixel from the

564 center to the circumference and nanoparticle intensity averaged and exported at 10  $\mu\text{m}$  intervals  
565 into an Excel spreadsheet for graphing using GraphPad Prism (V 9.0.1).

566 For azimuthal averaging of the 3D dataset (approximately a spheroid hemisphere), data was first  
567 resized by a factor of three for ease of processing, the XYZ coordinates of the spheroid core defined  
568 by the user and a binary mask generated in 3D of the spheroid circumference. This was then used  
569 to define azimuth radii, correcting for reduced pixel resolution in Z (approximately three times  
570 that of XY). Once radii were defined, nanoparticle intensity data was calculated for a given radius  
571 from the spheroid center, and then interpolated to sample intensities over the linear range of radii  
572 (at 10  $\mu\text{m}$  intervals). Data was exported into a Microsoft Excel spreadsheet and imported into  
573 GraphPad Prism (V 9.0.1) for further processing.

574 For kinetic quantification, radially averaged and time evolving intensity profiles were used to  
575 extract particle diffusivity by the physical principles that are often employed in fluorescence  
576 recovery after photobleaching (FRAP) [65]. Briefly, for each radius from the spheroid center, the  
577 time evolution of average intensity in particle channel, was fitted with a forward in time, central  
578 in space (FTCS) diffusion model in 2D [38].

579 For each radial distance from the spheroid center,  $w$ , we extracted this way a diffusion time,  $t_D$ ,  
580 and from these two parameters were able to calculate particle diffusivity using the relationship in  
581 equation (1):

$$582 \quad D = \frac{w^2}{4t_D} \quad (1)$$

583 Data outputs were saved in Microsoft Excel spreadsheets and imported into GraphPad Prism for  
584 graphical sketching and statistics.

585 **Mathematical modelling to calculate diffusivity – Model development**

586 To calculate nanoparticle diffusion, we first considered the evolution of the number of  
587 nanoparticles,  $N(r,q,f,t)$ , as a function of radial distance from the center of the tumor spheroid,  $r$ ,  
588 the polar angle,  $q$ , the azimuthal angle,  $f$  and time,  $t$ . We made the assumption that the tumor  
589 spheroid can be approximated with a sphere, and that the number of nanoparticles does not depend  
590 on the orientation of the sphere. As such, we ignored the azimuthal and polar angles, and hence  
591 the number of nanoparticles,  $N(r,t)$  depends only on radial distance and time. We assumed that  
592 there was direct proportionality between the number of nanoparticles and relative, measured,  
593 fluorescence and given that all the imaging parameters were kept consistent, we could ignore the  
594 constant terms in the solution of the problem.

595 In this model we derive nanoparticle motion as primarily driven by diffusion. It is likely that  
596 nanoparticle motion is affected by the cells within the spheroid, and that cells may behave  
597 differently depending on distance from the center of the spheroid, as oxygen levels can decrease  
598 toward the center of the spheroid. Accordingly, we allow the diffusion function to vary as a  
599 function of the radial distance. This could correspond to changes in cell density or cell behavior as  
600 a function of the radial distance.

601 However, we do not specifically state the biological behavior behind potential changes in  
602 nanoparticle diffusion, we merely assume that diffusion can vary as a function of the radial  
603 distance. As such, the evolution of the number of nanoparticles is described by the following partial  
604 differential equation (PDE) (2);

605 
$$\frac{\partial N(r,t)}{\partial t} = \frac{1}{r^2} \frac{\partial}{\partial r} \left( r^2 D(r) \frac{\partial N(r,t)}{\partial r} \right) \quad (2)$$

606 where  $D(r)$  is the diffusivity of the nanoparticle as a function of radial distance. Outside of the  
607 spheroid, that is,  $r > r_{sph}$ , the nanoparticle diffusivity will be equal to the diffusivity given the  
608 Stokes-Einstein equation,  $D_{SE}$ , in equation (3),

$$609 \quad D(r) = D_{SE} = \frac{k_b T}{3\pi\eta d} \text{ for } r \geq r_{sph} \quad (3)$$

610 where  $k_b$  is the Boltzmann constant,  $T$  is the temperature,  $h$  is the dynamic viscosity and  $d$  is the  
611 diameter of the nanoparticle. We assumed that the diffusivity of the nanoparticle in the spheroid  
612 is reduced compared to the Stokes-Einstein equation. Further, we assumed that the nanoparticle  
613 diffusivity is most inhibited toward the center of the spheroid, where cell function may be impacted  
614 most significantly. We therefore make the choice that the nanoparticle diffusivity is described by  
615 equation (4),

$$616 \quad D(r) = D_{SE} \left( (1 - a) \left( \frac{r}{r_{max}} \right)^b + a \right) \text{ for } r < r_{sph} \quad (4)$$

617 where the parameter  $a$  and  $b$  are determined by the data. This choice of diffusivity function  
618 allows for a monotonic increase in diffusivity with radial distance, consistent with our  
619 assumptions, with the minimum diffusivity at the center of the spheroid given by  $D(0) = aD_{SE}$ .  
620 The rate of increase of diffusivity is controlled by the parameter  $b$ , where  $b = 1$  corresponds to a  
621 linear increase in diffusivity, for example. Importantly, at  $r = r_{sph}$ , the nanoparticle diffusivity is  
622 equal to the diffusivity given by the Stokes-Einstein equation. This choice of diffusivity function  
623 allows for flexibility, while still incorporating known nanoparticle behavior and minimizing the  
624 number of free parameters to be determined from the data. At the boundaries of the domain, at  $r$   
625  $= 0$  and  $r = r_{max}$  we made the assumption that, on average, a nanoparticle is equally likely to enter  
626 the domain as it is to leave the domain. This corresponded to a zero-flux boundary condition. At  
627 the beginning of the simulation,  $t = 0$ , we set the number of nanoparticles inside the spheroid to be

628 zero, with a constant number of nanoparticles outside of the spheroid, consistent with the  
629 experimental conditions.

### 630 **Mathematical modelling to calculate diffusivity – Solution method**

631 To obtain a solution to the PDE (2) governing the number of nanoparticles we first spatially  
632 discretized the governing PDE onto a uniform grid with spacing  $Dr$  via a central difference  
633 approximation for the spatial derivatives. We defined this grid between  $r = 0$  and  $r = r_{max} = Kr_{sph}$   
634 where  $K$  was chosen such that the boundary of the solution domain is sufficiently far away from  
635 the boundary of the spheroid and  $r_{sph} = 250$  mm. For all experimental datasets we chose  $K = 7$  and  
636 we verified that the solution is not sensitive to increases in  $K$ . We selected a backward Euler  
637 approximation with constant timesteps of length  $Dt$  to approximate the temporal derivative. We  
638 solved the PDE (2) up to  $t = 12$  h, consistent with the experiment, and select  $Dt$  such that we had  
639 2400 time steps, *i.e.*  $Dt = 0.005$  h. We solved the resulting system of tridiagonal equations using  
640 the Thomas algorithm.

### 641 **Mathematical modelling to calculate diffusivity – Parameter estimation**

642 To determine experiment-specific values of  $a$  and  $b$ , we fitted the numerical solution of the PDE  
643 (2) to the experimental data. Due to the three-dimensional averaging process, there can be a drop  
644 in fluorescence for sufficiently large  $r$  values if the spheroid is not perfectly symmetric and hence,  
645 we considered data for  $r$  values until we observe this drop.

646 We obtain the numerical solution for particular  $a$  and  $b$  values and compare the solution at the  $r$   
647 values where we have experimental measurements. Using MATLAB's *lsqnonlin* function, which  
648 implements the Levenberg-Marquadt algorithm, we determined values of  $a$  and  $b$  that best fit the  
649 data for each experiment. Further, we verified that the predicted number of nanoparticles (or,  
650 equally, the level arbitrary fluorescence) matched the experimental data well. For each experiment

651 we found that our model described the experimental data well. We determined  $a$  and  $b$  values for  
652 each replicate of an experiment and report the mean and standard error of  $a$  and  $b$  for each  
653 nanoparticle-spheroid combination.

#### 654 **Particle diffusion modelling in simulated spheroids**

655 To validate our analysis (DONUTS), we simulated spheroids of varying cell densities and sizes  
656 where particles were simulated to move from outside towards the core of spheroids. Simulated  
657 spheroid cellular positions in 3D were generated using the DistMesh package [66] and subsequent  
658 particle motion was overlaid over time in MATLAB using custom scripts available in  
659 Supplementary (R2020a, Mathworks, Natick, USA). The simulator allowed for varying cell and  
660 spheroid size as well as particle density, their diffusivity inside and outside of cell objects and the  
661 probabilities for particles to move in and out of cell objects. The simulated volume size was set to  
662 300 pixels in X, Y and Z, number of timepoints was set to 1000 frames, pixel size to 0.1  $\mu\text{m}$  and  
663 frame time to 1 s. To simulate the asymmetry in point spread function (PSF), the full width half  
664 maximum (FWHM) in XY was set to half that of the axial PSF FWHM (in Z). Within the total  
665 image volume, the spheroid volume was set to 50% of the total image space, enabling necessary  
666 free space for particle generation and directional uptake into the spheroid. Cell density fraction  
667 (CDF) defined the occurrence of the centroid of cell objects relative to the total spheroid, while  
668 cell radius ( $r$ ) defined the total cell size relative to these centroids, maintaining that  $\text{CDF} \geq 2r$  to  
669 prevent object overlap. CDF was varied to alter object density, while  $r$  was altered to cell object  
670 size, generating three convolved spheroids with CDF and  $r$  defined in

671 Table 1.

672

673 **Table 1.** Cell density fraction (CDF) and radius of convolved (simulated) spheroids used to  
674 model particle diffusion as a method of external validation of DONUTS.

| Spheroid Name           | CDF  | Radius ( $r$ ) |
|-------------------------|------|----------------|
| High Density            | 0.1  | 0.05           |
| Low Density Small Cell  | 0.05 | 0.025          |
| High Density Small Cell | 0.1  | 0.025          |

675

676 Final parameters assumed set diffusion coefficients for particles inside cells ( $D(\text{in})$ ) and  
677 particles outside or between cells ( $D(\text{out})$ ) as well as associated probabilities of whether a particle  
678 would enter a cell object, and if so, the subsequent probability of exiting cell objects.  $D(\text{in})$  was  
679 assumed to encompass all intracellular mechanisms of particle uptake and trafficking and was the  
680 only particle-related variable altered during simulations. Scripts are available in Supplementary.

#### 681 **Lightsheet microscopy: cell preparation and image acquisition**

682 Live spheroids of glioblastoma (U87), neuroblastoma (SK-N-BE(2)) and NSCLC (H460) were  
683 prepared as above. After 72 hours, spheroids were transferred into 150  $\mu\text{L}$  aliquots of fixing  
684 solution (4% paraformaldehyde (ProSci Tech PtyLtd, Australia), 0.1% glutaraldehyde (Sigma) in  
685 1% PBS) and fixed for 5 – 7 days ( $4^\circ\text{C}$ , gentle agitation at 70 rpm). Fixed spheroids were then  
686 embedded in 2% low melt agarose (Sigma) using a hollow plastic cylinder from FEP HS 0.125  
687 EXP/0.086 REC Fusing Sleeve (Zeus Virtual Sample Locker) as previously described [67].  
688 Agarose embedded spheroids were then transferred into Cubic L solution (10% Triton X-100, 10%  
689 N-buthyldiethanolamine in MilliQ water (w.w), Sigma) for 3 – 4 days ( $37^\circ\text{C}$ , 60 rpm agitation).  
690 Samples were washed thrice (PBS, 2 hours) before immersion in 1% PBS containing 1  $\mu\text{M}$  DAPI  
691 for 24 hours ( $37^\circ\text{C}$ , 60 rpm). Samples were washed thrice in PBS as above and finally transferred



692 into Cubic R solution (45% antipyrine, 30% nicotinamide in MilliQ water (w.w), Sigma) for a  
693 minimum of four days prior to imaging. Lightsheet imaging was conducted in Zen Black 2014  
694 SP1 (Zeiss) on a Zeiss Lightsheet Z.1 with 1.45 N cubic corrected Plan Neofluar 20X/1.0 objective  
695 and 10X/0.2 LSFM clearing lateral objectives. Magnification was adjusted to 1.0 times with a  
696 1920 by 1920-pixel grid. Z-stack step size was set to optimal (0.390 – 0.412  $\mu\text{m}$ ) and images  
697 acquired with a 405 nm laser (2.0%, 99.95 ms exposure), 405/488/561/640 laser block filter and  
698 emission 460-500 BP. Images were exported for processing in Zen Black (2.1 SP3, Zeiss), with  
699 Dual Side Fusion of left and right lasers using Maximum Intensity Fusion. Analysis for single  
700 nuclei detection was done as referenced in [41] and further quantification of Nearest Neighbor  
701 Distances (NND) between nuclei was done in custom built scripts in MATLAB (2020a,  
702 MathWorks, Natick, USA). Script is available in Supplementary, and full instructions for  
703 reproduction and use available in User Guide, also in the Supplementary Material.

#### 704 **Force imaging cytometry for cell diameter, deformation and stiffness**

705 The diameter, stiffness and deformation of U87, SK-N-BE(2) and H460 single cell suspensions  
706 was measured using force imaging cytometry and real-time deformation, as described previously  
707 [68]. Briefly, cells were harvested from a 70-90% confluent flask as described in culture conditions  
708 above, counted using Trypan Blue and resuspended in 1-2 mL PBS at  $3 \times 10^5$  cells / mL. These  
709 cells were then centrifuged as above and gently resuspended in CellCarrier A buffer (Zellmechanik  
710 Dresden) before being transferred into a Falcon<sup>TM</sup> round-bottom polystyrene test tube with cell  
711 strainer cap (Corning) to ensure single cell suspension. Samples were loaded onto a syringe pump  
712 (neMESYS; Cetoni), AcCellerator L1 system (Zellmechanik Dresden) with synchronized pulsed  
713 LED illumination. This system was built into a Zeiss AxioObserver (Zeiss, Germany) with  
714 40X/0.65 objective, CMOS camera, with a 1024 x 1280 pixel grid, 8 bit imaging depth, maximal

715 resolution of 340 nm per pixel and frame rate of 4000 frames s<sup>-1</sup>. Samples were run through 30 μm  
716 microfluidic chips at a cell flow rate of 0.0400 μL s<sup>-1</sup> and sheath flow rate of 0.120 μL s<sup>-1</sup> using  
717 Shape In (2.2.2.4). Hard area gates were set at 50 – 200 μm<sup>2</sup> depending on cell size to exclude  
718 particulate matter. Raw data was exported and analyzed in Shape Out (2.6.4), with manual curation  
719 to gate true single cell populations, followed by calculation of Young's Modulus, deformation  
720 according to equation (5) [68].

$$721 \quad \text{Deformation} = 1 - \frac{2\sqrt{\pi(\text{Area})}}{\text{Perimeter}} \quad (5)$$

722 Statistical analysis was performed in PRISM (9.0.1).

### 723 **Data Statement**

724 All data presented in this manuscript is available from the corresponding author on request.

725 All custom scripts have been made available at [GitHub link prior to publication], along with the  
726 User Guide for installation of MATLAB and walkthrough use of the DONUTS analysis package.  
727 Supporting analysis packages in MATLAB are also included. These can be accessed via GitHub  
728 above, or in the zipped folder in the Supplementary of this paper.

729 **Supporting Information Available:** Supplementary data (figures and tables) are included which  
730 support data included in the primary manuscript. In addition, an analysis package for DONUTS is  
731 included as a .zip file. This contains the code for DONUTS analysis scripts for use in MATLAB  
732 and a READ ME User Guide which provides step-by-step instructions for the installation and use  
733 of all analysis packages detailed in the manuscript, with the intention to assist general use of this  
734 data analysis platform. Embedded in the User Guide are also four sample datasets accessible  
735 through FigShare, which can be used to test and validate our analysis platform. This guide also  
736 contains information to assist in initial experimental setup and trouble-shooting recommendations.

737

738

739 AUTHOR CONTRIBUTIONS

740 MK conceived the initial project and provided funding and supervision, with TPD and JM. MK,  
741 EJC and RMW provided experimental, modelling and imaging resources, respectively. AA-C  
742 refined the project conception, developed methodologies, and performed all experiments, with  
743 support from EP, CH, FMM and RMW. AA-C and EP conceived the analysis method DONUTS  
744 and EP developed analysis scripts. AA-C and EP performed validation of DONUTS analysis. STJ  
745 developed applied mathematical modelling analysis and investigated nanoparticle penetration  
746 kinetics, with support from EJC. AA-C prepared the figures and wrote the manuscript. FMM,  
747 RMW and MK reviewed and edited versions of the manuscript. EP and STJ reviewed the  
748 manuscript and provided additional input for methodology and analysis. All authors read and  
749 approved the final manuscript.

750 ACKNOWLEDGMENTS

751 This work was supported by the Children's Cancer Institute, which is affiliated with the  
752 University of New South Wales (UNSW Sydney), and the Sydney Children's Hospital Network,  
753 and by grants from the National Health and Medical Research (Program Grant APP1091261 and  
754 Principal Research Fellowship APP1119152 to MK) and Cancer Institute New South Wales  
755 Program Grant (TPG2037 to MK). MK is also supported by Australian Research Council Center  
756 of Excellence in Convergent Bio-Nano Science and Technology (CE140100036). AA-C  
757 acknowledges support from the Scientia PhD Scholarship Scheme (UNSW Sydney), the Josee  
758 Hilton Excellence Award and Children's Cancer Institute Postgraduate Top-up Scholarship. STJ  
759 is supported by the Australian Research Council (DE200100988). The authors would like to  
760 thank the Katharina Gaus Light Microscopy, at the Mark Wainwright Analytical Center for their  
761 support and resources involved in this work, and the Cancer Institute of NSW for a donation that

762 allowed the acquisition of a Zeiss LSM 880 used in this work. The authors would also like to  
763 thank J. Fletcher for his mnemonic which refined the name of this analysis method.

764 # Special acknowledgement of our colleague and dear friend, Professor Edmund Crampin, who  
765 passed away during the writing of this manuscript.

766

767 Reference List

- 768 [1] J. Shi, P.W. Kantoff, R. Wooster, O.C. Farokhzad, Cancer nanomedicine: progress,  
769 challenges and opportunities, *Nature Reviews Cancer*. 17 (2017) 20-37.
- 770 [2] C. Rodriguez-Nogales, Y. Gonzalez-Fernandez, A. Aldaz, P. Couvreur, M.J. Blanco-Prieto,  
771 Nanomedicines for pediatric cancers, *ACS Nano*. 12 (2018) 7482-7496.
- 772 [3] S.M. Sagnella, J.A. McCarroll, M. Kavallaris, Drug delivery: beyond active tumour targeting,  
773 Nanomedicine: Nanotechnology, Biology and Medicine. 10 (2014) 1131-1137.
- 774 [4] F. Danhier, To exploit the tumor microenvironment: since the EPR effect fails in the clinic,  
775 what is the future of nanomedicine? *Journal of Controlled Release*. 244 (2016) 108-121.
- 776 [5] D. Tarn, C.E. Ashley, M. Xue, E.C. Carnes, J.I. Zink, C.J. Brinker, Mesoporous silica  
777 nanoparticle nanocarriers: biofunctionality and biocompatibility, *Accounts of Chemical*  
778 *Research*. 46 (2013) 792-801.
- 779 [6] M.N. Vu, P. Rajasekhar, D.P. Poole, S.Y. Khor, N.P. Truong, C.J. Nowell, J.F. Quinn, M.  
780 Whittaker, N.A. Veldhuis, T.P. Davis, Rapid Assessment of Nanoparticle Extravasation in a  
781 Microfluidic Tumor Model, *ACS Applied Nano Materials*. 2 (2019) 1844-1856.
- 782 [7] N. Bertrand, P. Grenier, M. Mahmoudi, E.M. Lima, E.A. Appel, F. Dormont, J. Lim, R.  
783 Karnik, R. Langer, O.C. Farokhzad, Mechanistic understanding of in vivo protein corona  
784 formation on polymeric nanoparticles and impact on pharmacokinetics, *Nature Communications*.  
785 8 (2017) 777-785.
- 786 [8] H. Wang, R. Ran, Y. Liu, Y. Hui, B. Zeng, D. Chen, D.A. Weitz, C. Zhao, Tumor-  
787 vasculature-on-a-chip for investigating nanoparticle extravasation and tumor accumulation, *ACS*  
788 *Nano*. 12 (2018) 11600-11609.
- 789 [9] K.P. Ricketts, U. Cheema, A. Nyga, A. Castoldi, C. Guazzoni, T. Magdeldin, M. Emberton,  
790 A.P. Gibson, G.J. Royle, M. Loizidou, A 3D in vitro cancer model as a platform for nanoparticle  
791 uptake and imaging investigations, *Small*. 10 (2014) 3954-3961.
- 792 [10] A. Tchoryk, V. Taresco, R.H. Argent, M. Ashford, P.R. Gellert, S. Stolnik, A. Grabowska,  
793 M.C. Garnett, Penetration and Uptake of Nanoparticles in 3D Tumor Spheroids, *Bioconjugate*  
794 *Chemistry*. 30 (2019) 1371-1384.
- 795 [11] A.W. Du, H. Lu, M.H. Stenzel, Core-cross-linking accelerates antitumor activities of  
796 paclitaxel-conjugate micelles to prostate multicellular tumor spheroids: a comparison of 2D and  
797 3D models, *Biomacromolecules*. 16 (2015) 1470-1479.
- 798 [12] S. Däster, N. Amatruda, D. Calabrese, R. Ivanek, E. Turrini, R.A. Drosner, P. Zajac, C.  
799 Fimognari, G.C. Spagnoli, G. Iezzi, Induction of hypoxia and necrosis in multicellular tumor

- 800 spheroids is associated with resistance to chemotherapy treatment, *Oncotarget*. 8 (2017) 1725–  
801 1736.
- 802 [13] G. Mehta, A.Y. Hsiao, M. Ingram, G.D. Luker, S. Takayama, Opportunities and challenges  
803 for use of tumor spheroids as models to test drug delivery and efficacy, *J. Controlled Release*.  
804 164 (2012) 192-204.
- 805 [14] A.S. Mikhail, S. Eetezadi, C. Allen, Multicellular tumor spheroids for evaluation of  
806 cytotoxicity and tumor growth inhibitory effects of nanomedicines in vitro: a comparison of  
807 docetaxel-loaded block copolymer micelles and Taxotere®, *PloS One*. 8 (2013) e62630:1-11.
- 808 [15] T. Tieu, S. Irani, K.L. Bremert, N.K. Ryan, M. Wojnilowicz, M. Helm, H. Thissen, N.H.  
809 Voelcker, L.M. Butler, A. Cifuentes- Rius, Patient- Derived Prostate Cancer Explants: A  
810 Clinically Relevant Model to Assess siRNA- Based Nanomedicines, *Advanced Healthcare*  
811 *Materials*. 10 (2021) 2001594:1-11.
- 812 [16] V. Parvathaneni, N.S. Kulkarni, G. Chauhan, S.K. Shukla, R. Elbatany, B. Patel, N.K.  
813 Kunda, A. Muth, V. Gupta, Development of pharmaceutically scalable inhaled anti-cancer  
814 nanotherapy–Repurposing amodiaquine for non-small cell lung cancer (NSCLC), *Materials*  
815 *Science and Engineering: C*. 115 (2020) 111139:1-19.
- 816 [17] B. Patra, C. Peng, W. Liao, C. Lee, Y. Tung, Drug testing and flow cytometry analysis on a  
817 large number of uniform sized tumor spheroids using a microfluidic device, *Scientific Reports*. 6  
818 (2016) 21061:1-12.
- 819 [18] T. Tieu, M. Wojnilowicz, P. Huda, K.J. Thurecht, H. Thissen, N.H. Voelcker, A. Cifuentes-  
820 Rius, Nanobody-displaying porous silicon nanoparticles for the co-delivery of siRNA and  
821 doxorubicin, *Biomaterials Science*. 9 (2021) 133-147.
- 822 [19] E.C. Costa, A.F. Moreira, D. de Melo-Diogo, V.M. Gaspar, M.P. Carvalho, I.J. Correia, 3D  
823 tumor spheroids: an overview on the tools and techniques used for their analysis, *Biotechnology*  
824 *Advances*. 34 (2016) 1427-1441.
- 825 [20] A. Arakawa, N. Jakubowski, G. Koellensperger, S. Theiner, A. Schweikert, S. Flemig, D.  
826 Iwahata, H. Traub, T. Hirata, Quantitative Imaging of Silver Nanoparticles and Essential  
827 Elements in Thin Sections of Fibroblast Multicellular Spheroids by High Resolution Laser  
828 Ablation Inductively Coupled Plasma Time-of-Flight Mass Spectrometry, *Analytical Chemistry*.  
829 91 (2019) 10197-10203.
- 830 [21] S. Goodarzi, A. Prunet, F. Rossetti, G. Bort, O. Tillement, E. Porcel, S. Lacombe, T. Wu, J.  
831 Guerquin-Kern, H. Delanoë-Ayari, Quantifying nanotherapeutic penetration using a hydrogel-  
832 based microsystem as a new 3D in vitro platform, *Lab on a Chip*. (2021).
- 833 [22] Y. Wang, A.B. Hummon, Mass spectrometry imaging of multicellular tumor spheroids and  
834 organoids as an emerging tool for personalized medicine and drug discovery, *J. Biol. Chem*.  
835 (2021) 101139.

- 836 [23] J.S. Basuki, H.T. Duong, A. Macmillan, R.B. Erlich, L. Esser, M.C. Akerfeldt, R.M. Whan,  
837 M. Kavallaris, C. Boyer, T.P. Davis, Using fluorescence lifetime imaging microscopy to monitor  
838 theranostic nanoparticle uptake and intracellular doxorubicin release, *ACS Nano*. 7 (2013)  
839 10175-10189.
- 840 [24] E. Hinde, K. Thammairaphop, H.T. Duong, J. Yeow, B. Karagoz, C. Boyer, J.J. Gooding,  
841 K. Gaus, Pair correlation microscopy reveals the role of nanoparticle shape in intracellular  
842 transport and site of drug release, *Nature Nanotechnology*. 12 (2017) 81-89.
- 843 [25] J. Yao, J. Feng, X. Gao, D. Wei, T. Kang, Q. Zhu, T. Jiang, X. Wei, J. Chen,  
844 Neovasculature and circulating tumor cells dual-targeting nanoparticles for the treatment of the  
845 highly-invasive breast cancer, *Biomaterials*. 113 (2017) 1-17.
- 846 [26] S.M. Sagnella, H. Duong, A. MacMillan, C. Boyer, R. Whan, J.A. McCarroll, T.P. Davis,  
847 M. Kavallaris, Dextran-based doxorubicin nanocarriers with improved tumor penetration,  
848 *Biomacromolecules*. 15 (2013) 262-275.
- 849 [27] Y. Su, J. Fang, C. Liao, C. Lin, Y. Li, S. Hu, Targeted mesoporous iron oxide nanoparticles-  
850 encapsulated perfluorohexane and a hydrophobic drug for deep tumor penetration and therapy,  
851 *Theranostics*. 5 (2015) 1233–1248.
- 852 [28] N. Rapoport, R. Gupta, Y.S. Kim, B.E. O'Neill, Polymeric micelles and nanoemulsions as  
853 tumor-targeted drug carriers: Insight through intravital imaging, *Journal of Controlled Release*.  
854 206 (2015) 153-160.
- 855 [29] T. Achilli, S. McCalla, J. Meyer, A. Tripathi, J.R. Morgan, Multilayer spheroids to quantify  
856 drug uptake and diffusion in 3D, *Molecular pharmaceuticals*. 11 (2014) 2071-2081.
- 857 [30] B. Stewart, C.P. Wild, *World Cancer Report 2014*, World Health Organisation, 2016.
- 858 [31] S. Kim, J.B. Harford, K.F. Pirollo, E.H. Chang, Effective treatment of glioblastoma requires  
859 crossing the blood–brain barrier and targeting tumors including cancer stem cells: the promise of  
860 nanomedicine, *Biochemical and Biophysical Research Communications*. (2015) 485-489.
- 861 [32] S.M. Sagnella, J. Trieu, H. Brahmabhatt, J.A. MacDiarmid, A. MacMillan, R.M. Whan, C.M.  
862 Fife, J.A. McCarroll, A.J. Gifford, D.S. Ziegler, M. Kavallaris, Targeted Doxorubicin-Loaded  
863 Bacterially Derived Nano-Cells for the Treatment of Neuroblastoma, *Molecular Cancer*  
864 *Therapeutics*. 17 (2018) 1012-1023.
- 865 [33] Y. Zhou, Y. Zhou, T. Shingu, L. Feng, Z. Chen, M. Ogasawara, M.J. Keating, S. Kondo, P.  
866 Huang, Metabolic alterations in highly tumorigenic glioblastoma cells: preference for hypoxia  
867 and high dependency on glycolysis, *The Journal of Biological Chemistry*. 286 (2011) 32843-  
868 32853.

- 869 [34] A. Seyfoori, E. Samiei, N. Jalili, B. Godau, M. Rahmanian, L. Farahmand, K. Majidzadeh-  
870 A, M. Akbari, Self-filling microwell arrays (SFMA) for tumor spheroid formation, *Lab on a*  
871 *Chip*. 18 (2018) 3516-3528.
- 872 [35] M. Faria, M. Björnmalm, K.J. Thurecht, S.J. Kent, R.G. Parton, M. Kavallaris, A.P.  
873 Johnston, J.J. Gooding, S.R. Corrie, B.J. Boyd, Minimum information reporting in bio-nano  
874 experimental literature, *Nature Nanotechnology*. 13 (2018) 777-785.
- 875 [36] E. Vlashi, L.E. Kelderhouse, J.E. Sturgis, P.S. Low, Effect of folate-targeted nanoparticle  
876 size on their rates of penetration into solid tumors, *ACS Nano*. 7 (2013) 8573-8582.
- 877 [37] B.L. Sprague, R.L. Pego, D.A. Stavreva, J.G. McNally, Analysis of binding reactions by  
878 fluorescence recovery after photobleaching, *Biophysical Journal*. 86 (2004) 3473-3495.
- 879 [38] C.A. Fletcher, Computational techniques for fluid dynamics. Volume 1-Fundamental and  
880 general techniques. Volume 2-Specific techniques for different flow categories, Berlin and New  
881 York. 1 (1988).
- 882 [39] S.T. Hess, W.W. Webb, Focal volume optics and experimental artifacts in confocal  
883 fluorescence correlation spectroscopy, *Biophys. J*. 83 (2002) 2300-2317.
- 884 [40] Y. Ma, E. Pandzic, P.R. Nicovich, Y. Yamamoto, J. Kwiatek, S.V. Pagon, A. Benda, J.  
885 Rossy, K. Gaus, An intermolecular FRET sensor detects the dynamics of T cell receptor  
886 clustering, *Nature communications*. 8 (2017) 1-11.
- 887 [41] Y. Gao, M.L. Kilfoi, Accurate detection and complete tracking of large populations of  
888 features in three dimensions, *Optics Express*. 17 (2009) 4685-4704.
- 889 [42] A.M. Sandercock, S. Rust, S. Guillard, K.F. Sachsenmeier, N. Holoweckyj, C. Hay, M.  
890 Flynn, Q. Huang, K. Yan, B. Herpers, Identification of anti-tumour biologics using primary  
891 tumour models, 3-D phenotypic screening and image-based multi-parametric profiling,  
892 *Molecular Cancer*. 14 (2015) 1-18.
- 893 [43] D. Khaitan, B.S. Dwarakanath, Multicellular spheroids as an in vitro model in experimental  
894 oncology: applications in translational medicine, *Expert Opinion on Drug Discovery*. 1 (2006)  
895 663-675.
- 896 [44] C. Calandrini, F. Schutgens, R. Oka, T. Margaritis, T. Candelli, L. Mathijssen, C.  
897 Ammerlaan, R.L. van Ineveld, S. Derakhshan, S. de Haan, An organoid biobank for childhood  
898 kidney cancers that captures disease and tissue heterogeneity, *Nature Communications*. 11  
899 (2020) 1-14.
- 900 [45] M.J. Ware, V. Keshishian, J.J. Law, J.C. Ho, C.A. Favela, P. Rees, B. Smith, S.  
901 Mohammad, R.F. Hwang, K. Rajapakshe, Generation of an in vitro 3D PDAC stroma rich  
902 spheroid model, *Biomaterials*. 108 (2016) 129-142.



- 903 [46] T.S. Deisboeck, M.E. Berens, A.R. Kansal, S. Torquato, A.O. Stemmerâ-Rachamimov, E.A.  
904 Chiocca, Pattern of self-organization in tumour systems: complex growth dynamics in a novel  
905 brain tumour spheroid model, *Cell Proliferation*. 34 (2001) 115-134.
- 906 [47] H. Ma, Q. Jiang, S. Han, Y. Wu, J.C. Tomshine, D. Wang, Y. Gan, G. Zou, X. Liang,  
907 Multicellular Tumor Spheroids as an in Vivo-Like Tumor Model for Three-Dimensional  
908 Imaging of Chemotherapeutic and Nano Material Cellular Penetration, *Molecular Imaging*. 11  
909 (2012) 487-498.
- 910 [48] D.A. Winkler, Computational Modelling of Magnetic Nanoparticle Properties and In Vivo  
911 Responses, *Current Medicinal Chemistry*. 24 (2017) 483-496.
- 912 [49] S. Johnston, M. Faria, E. Crampin, Quantifying the Influence of Nanoparticle Polydispersity  
913 on Cellular Delivered Dose, *Biophysical Journal*. 116 (2019) 33a.
- 914 [50] H.J. Bowers, E.E. Fannin, A. Thomas, J.A. Weis, Characterization of multicellular breast  
915 tumor spheroids using image data-driven biophysical mathematical modeling, *Scientific Reports*.  
916 10 (2020) 1-12.
- 917 [51] S.T. Johnston, M. Faria, E.J. Crampin, Understanding nano-engineered particle-cell  
918 interactions: biological insights from mathematical models, *Nanoscale Advances*. 3 (2021) 2139-  
919 2156.
- 920 [52] E. Vlashi, L.E. Kelderhouse, J.E. Sturgis, P.S. Low, Effect of folate-targeted nanoparticle  
921 size on their rates of penetration into solid tumors, *ACS Nano*. 7 (2013) 8573-8582.
- 922 [53] H. Bao, Q. Zhang, H. Xu, Z. Yan, Effects of nanoparticle size on antitumor activity of 10-  
923 hydroxycamptothecin-conjugated gold nanoparticles: in vitro and in vivo studies, *International*  
924 *Journal of Nanomedicine*. 11 (2016) 929-940.
- 925 [54] A. Albanese, P.S. Tang, W.C. Chan, The effect of nanoparticle size, shape, and surface  
926 chemistry on biological systems, *Annual Review of Biomedical Engineering*. 14 (2012) 1-16.
- 927 [55] Y. Wang, P. Chen, G. Zhao, K. Sun, D. Li, X. Wan, J. Zhang, Inverse relationship between  
928 elemental selenium nanoparticle size and inhibition of cancer cell growth in vitro and in vivo,  
929 *Food and Chemical Toxicology*. 85 (2015) 71-77.
- 930 [56] R. Chignola, A. Schenetti, G. Andrighetto, E. Chiesa, R. Foroni, S. Sartoris, G. Tridente, D.  
931 Liberati, Forecasting the growth of multicell tumour spheroids: implications for the dynamic  
932 growth of solid tumours, *Cell Proliferation*. 33 (2000) 219-229.
- 933 [57] Y. Matsumoto, J.W. Nichols, K. Toh, T. Nomoto, H. Cabral, Y. Miura, R.J. Christie, N.  
934 Yamada, T. Ogura, M.R. Kano, Y. Matsumura, N. Nishiyama, T. Yamasoba, Y.H. Bae, K.  
935 Kataoka, Vascular bursts enhance permeability of tumour blood vessels and improve  
936 nanoparticle delivery, *Nat. Nanotechnol*. 11 (2016) 533-538.

- 937 [58] H.T. Nia, H. Liu, G. Seano, M. Datta, D. Jones, N. Rahbari, J. Incio, V.P. Chauhan, K. Jung,  
938 J.D. Martin, Solid stress and elastic energy as measures of tumour mechanopathology, *Nature*  
939 *biomedical engineering*. 1 (2016) 1-11.
- 940 [59] Q. Yu, M.G. Roberts, L. Houdaihed, Y. Liu, K. Ho, G. Walker, C. Allen, R.M. Reilly, I.  
941 Manners, M.A. Winnik, Investigating the influence of block copolymer micelle length on  
942 cellular uptake and penetration in a multicellular tumor spheroid model, *Nanoscale*. 13 (2021)  
943 280-291.
- 944 [60] S. Sindhvani, A.M. Syed, J. Ngai, B.R. Kingston, L. Maiorino, J. Rothschild, P. MacMillan,  
945 Y. Zhang, N.U. Rajesh, T. Hoang, The entry of nanoparticles into solid tumours, *Nature*  
946 *Materials*. 19 (2020) 566-575.
- 947 [61] A.I. Minchinton, I.F. Tannock, Drug penetration in solid tumours, *Nature Reviews Cancer*.  
948 6 (2006) 583-592.
- 949 [62] A.A. Manzoor, L.H. Lindner, C.D. Landon, J. Park, A.J. Simnick, M.R. Dreher, S. Das, G.  
950 Hanna, W. Park, A. Chilkoti, Overcoming limitations in nanoparticle drug delivery: triggered,  
951 intravascular release to improve drug penetration into tumors, *Cancer Research*. 72 (2012) 5566-  
952 5575.
- 953 [63] D.L. Priwitaningrum, J.G. Blondé, A. Sridhar, J. van Baarlen, W.E. Hennink, G. Storm, S.  
954 Le Gac, J. Prakash, Tumor stroma-containing 3D spheroid arrays: A tool to study nanoparticle  
955 penetration, *Journal of Controlled Release*. 244 (2016) 257-268.
- 956 [64] J. O'Brien, I. Wilson, T. Orton, F. Pognan, Investigation of the Alamar Blue (resazurin)  
957 fluorescent dye for the assessment of mammalian cell cytotoxicity, *European Journal of*  
958 *Biochemistry*. 267 (2000) 5421-5426.
- 959 [65] D. Axelrod, D.E. Koppel, J. Schlessinger, E. Elson, W.W. Webb, Mobility measurement by  
960 analysis of fluorescence photobleaching recovery kinetics, *Biophysical Journal*. 16 (1976) 1055-  
961 1069.
- 962 [66] P. Persson, G. Strang, A simple mesh generator in MATLAB, *SIAM Review*. 46 (2004)  
963 329-345.
- 964 [67] R.S. Udan, V.G. Piazza, C. Hsu, A. Hadjantonakis, M.E. Dickinson, Quantitative imaging  
965 of cell dynamics in mouse embryos using light-sheet microscopy, *Development*. 141 (2014)  
966 4406-4414.
- 967 [68] P. Rosendahl, K. Plak, A. Jacobi, M. Kraeter, N. Toepfner, O. Otto, C. Herold, M. Winzi,  
968 M. Herbig, Y. Ge, Real-time fluorescence and deformability cytometry, *Nature methods*. 15  
969 (2018) 355-358.
- 970

## SUPPLEMENTARY DATA

bioRxiv preprint doi: <https://doi.org/10.1101/2021.10.26.465839>; this version posted October 28, 2021. The copyright holder for this preprint (which was not certified by peer review) is the author/funder. All rights reserved. No reuse allowed without permission.

# Spatial-temporal analysis of nanoparticles in live tumor spheroids impacted by cell origin and density

*Aria Ahmed-Cox,<sup>1,2,3</sup> Elvis Pandzic,<sup>4</sup> Stuart T. Johnston,<sup>5</sup> Celine Heu,<sup>4</sup> John McGhee,<sup>2,6</sup> Friederike M. Mansfeld,<sup>1,2,3,7</sup> Edmund J. Crampin,<sup>5,8,#</sup> Thomas P. Davis,<sup>9</sup> Renee M. Whan,<sup>4</sup> and Maria Kavallaris<sup>1,2,3\*</sup>*

<sup>1</sup> Children's Cancer Institute, Lowy Cancer Research Centre, UNSW Sydney, NSW, 2031, Australia

<sup>2</sup> ARC Centre of Excellence in Convergent Bio-Nano Science and Technology, Australian Centre for NanoMedicine, UNSW Sydney, NSW 2031, Australia

<sup>3</sup> School of Women and Children's Health, Faculty of Medicine and Health, UNSW Sydney, NSW, 2031, Australia

<sup>4</sup> Katharina Gaus Light Microscopy Facility, Mark Wainwright Analytical Centre, UNSW Sydney, NSW, 2031, Australia

<sup>5</sup> ARC Centre of Excellence in Convergent Bio-Nano Science and Technology, Systems Biology Laboratory, School of Mathematics and Statistics, and Department of Biomedical Engineering, University of Melbourne, Parkville, Victoria, 3010, Australia

<sup>6</sup> 3D Visualisation Aesthetics Lab, UNSW Art & Design, UNSW Sydney, NSW, 2021, Australia

<sup>7</sup> ARC Centre of Excellence in Convergent Bio-Nano Science and Technology, Monash Institute of Pharmaceutical Sciences, Melbourne, Victoria, 3052, Australia

<sup>8</sup> School of Medicine, Faculty of Medicine Dentistry and Health Sciences, University of Melbourne, Parkville, Victoria, 3010, Australia

<sup>9</sup> Precision Medicine, Australian Institute of Bioengineering & Nanotechnology, University of Queensland, QLD, 40679, Australia

\* Corresponding author: Maria Kavallaris [m.kavallaris@ccia.unsw.edu.au](mailto:m.kavallaris@ccia.unsw.edu.au)

## SUPPLEMENTARY DATA

bioRxiv preprint doi: <https://doi.org/10.1101/2021.10.26.465839>; this version posted October 28, 2021. The copyright holder for this preprint (which was not certified by peer review) is the author/funder. All rights reserved. No reuse allowed without permission.

# Deceased

## SUPPLEMENTARY DATA

bioRxiv preprint doi: <https://doi.org/10.1101/2021.10.26.465839>; this version posted October 28, 2021. The copyright holder for this preprint (which was not certified by peer review) is the author/funder. All rights reserved. No reuse allowed without permission.

### Table of Contents

#### Supplementary Figures

|                                                                                                                                                           |    |
|-----------------------------------------------------------------------------------------------------------------------------------------------------------|----|
| Supplementary Figure 1: Spheroid growth of glioblastoma (U87), neuroblastoma (SK-N-BE(2)) and non-small cell lung cancer (H460).....                      | 4  |
| Supplementary Figure 2: Spheroid viability and characteristics .....                                                                                      | 5  |
| Supplementary Figure 3: Cell viability of glioblastoma (U87) cells treated with silica nanoparticles (SiNPs) and membrane dye (DiO).....                  | 6  |
| Supplementary Figure 4: Cell viability of neuroblastoma (SK-N-BE(2)) cells treated with silica nanoparticles (SiNPs) and membrane dye (DiO). .....        | 7  |
| Supplementary Figure 5: Cell viability of non-small cell lung cancer (H460) cells treated with silica nanoparticles (SiNPs) and membrane dye (DiO). ..... | 8  |
| Supplementary Figure 6: 3D Azimuthal quantification of 30 nm SiNP uptake .....                                                                            | 9  |
| Supplementary Figure 7: Silica nanoparticle (SiNP) uptake in neuroblastoma (SK-N-BE(2)) tumor spheroids over 12 hours.....                                | 10 |
| Supplementary Figure 8: Silica nanoparticle (SiNP) uptake in non-small cell lung cancer (H460) tumor spheroids over 12 hours .....                        | 11 |
| Supplementary Figure 9: Adjusted r squared ( $R^2$ ) fit values for silica nanoparticle (SiNP) diffusion kinetics.....                                    | 12 |
| Supplementary Figure 10: Single cell stiffness of U87, SK-N-BE(2) and H460 cells.....                                                                     | 13 |
| Supplementary Figure 11: Single cell deformation of U87, SK-N-BE(2) and H460 cells.....                                                                   | 14 |

#### Supplementary Tables

|                                                                                                                                                                                                                                                                        |    |
|------------------------------------------------------------------------------------------------------------------------------------------------------------------------------------------------------------------------------------------------------------------------|----|
| <b>Supplementary Table 1: Cell characteristics of U87, SK-N-BE(2) and H460</b> with the mean and median diameters, alongside cell counts and deformation. Quantified using single-cell force imaging cytometry at a total flow rate of $0.160 \text{ uL s}^{-1}$ ..... | 12 |
|------------------------------------------------------------------------------------------------------------------------------------------------------------------------------------------------------------------------------------------------------------------------|----|

## SUPPLEMENTARY DATA

bioRxiv preprint doi: <https://doi.org/10.1101/2021.10.26.465839>; this version posted October 28, 2021. The copyright holder for this preprint (which was not certified by peer review) is the author/funder. All rights reserved. No reuse allowed without permission.

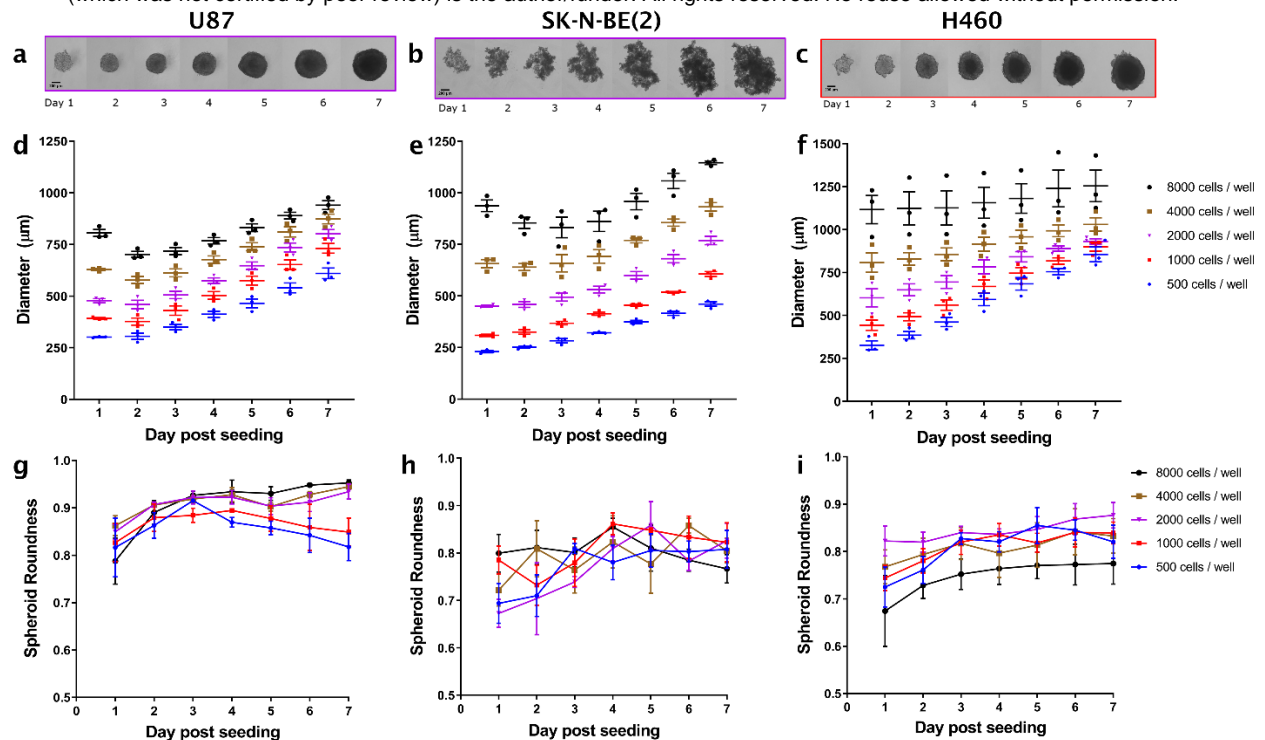

**Supplementary Figure 1: Spheroid growth of glioblastoma (U87), neuroblastoma (SK-N-BE(2)) and non-small cell lung cancer (H460) seeded at Day 0 and imaged daily for 7 days. (a) Representative growth of U87, (b) SK-N-BE(2) spheroid (2000 cells at Day 0). (c) Representative growth of H460 spheroid (1000 cells at Day 0). Scale bar, 200 µm. This growth was quantified in ImageJ by measuring the diameter each day in (d) U87, (e) SK-N-BE(2) and (f) H460 spheroids at different seeding densities indicated in (f). Points, individual biological replicates (n=3) per time point, per seeding density. Lines, mean of n=3 ± SEM. Growth characteristics were quantified by aspect ratio, defined above as roundness in (g) U87, (h) SK-N-BE(2) and (i) H460 spheroids at the same seeding densities as above. For ease of visualisation, points here represent mean of n=3. Bars, SEM.**

## SUPPLEMENTARY DATA

bioRxiv preprint doi: <https://doi.org/10.1101/2021.10.26.465839>; this version posted October 28, 2021. The copyright holder for this preprint (which was not certified by peer review) is the author/funder. All rights reserved. No reuse allowed without permission.

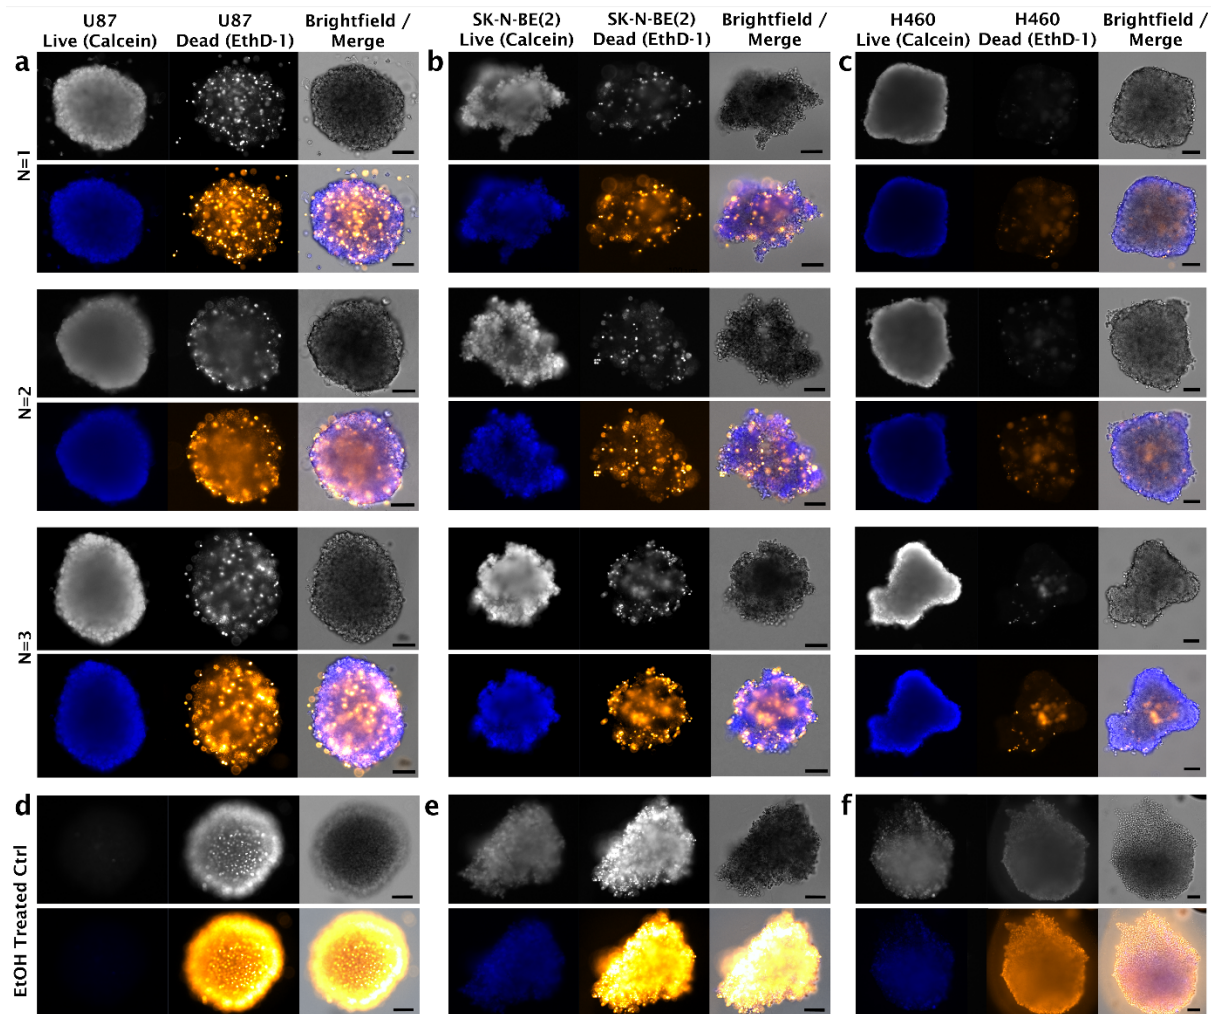

**Supplementary Figure 2: Spheroid viability and characteristics visualized through a live/dead assay** using Calcein and ethidium homodimer-1 (EthD-1). Representative brightfield and live (blue)/dead (orange-yellow) images of **(a)** U87 and **(b)** SK-N-BE(2) and **(c)** H460 cell spheroids, which were grown for 3 days in low adherent round-bottom well plates with an initial seeding density of  $2 \times 10^3$ , or  $8 \times 10^2$  cells for H460 specifically. Viability is contrasted against ethanol (EtOH) treated controls for **(d)** U87 and **(e)** SK-N-BE(2) and **(f)** H460 respectively. Scale bar, 100  $\mu\text{m}$ .

## SUPPLEMENTARY DATA

bioRxiv preprint doi: <https://doi.org/10.1101/2021.10.26.465839>; this version posted October 28, 2021. The copyright holder for this preprint (which was not certified by peer review) is the author/funder. All rights reserved. No reuse allowed without permission.

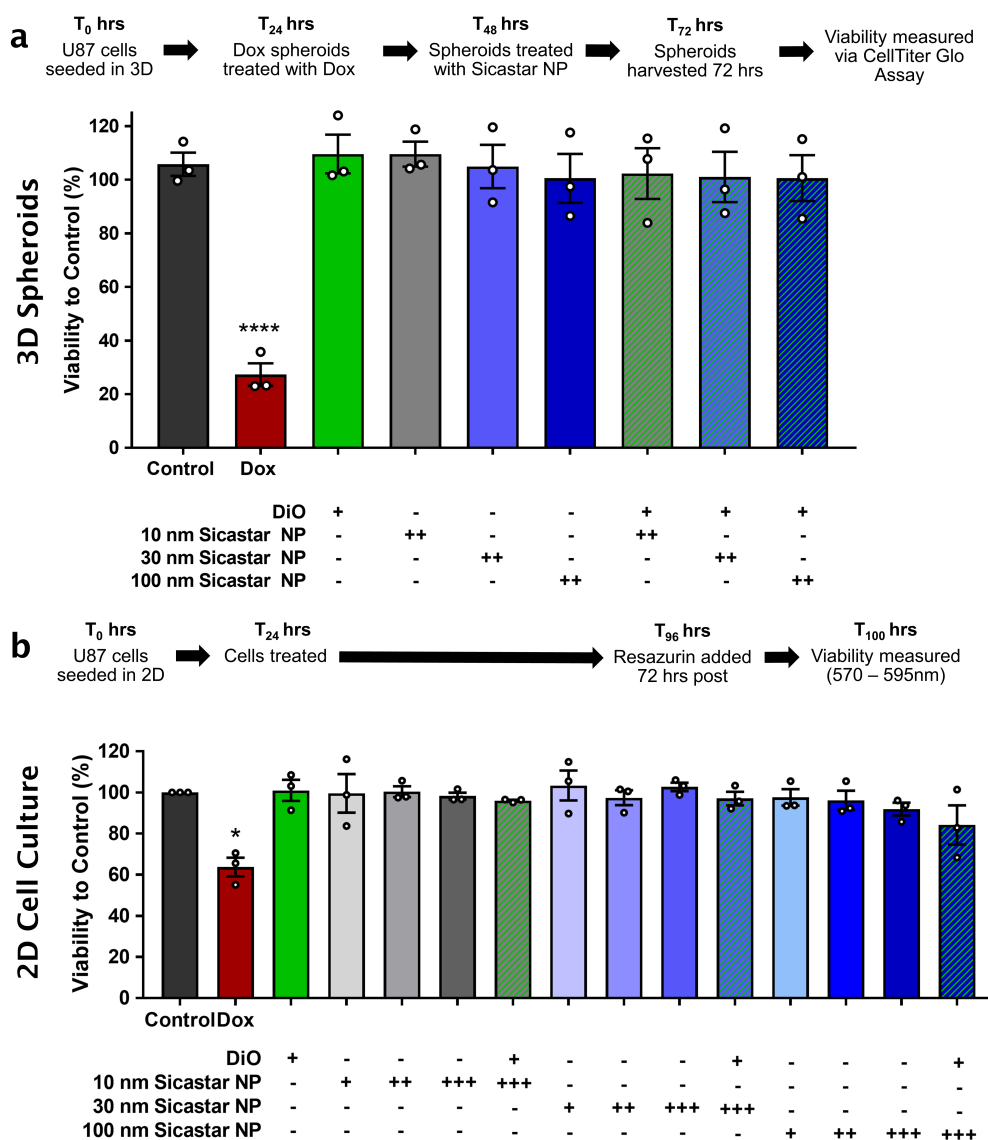

**Supplementary Figure 3: Cell viability of glioblastoma (U87) cells treated with silica nanoparticles (SiNPs) and membrane dye (DiO).** (a) 3D cell viability of U87 following treatment SiNPs alone or in combination with membrane dye (1  $\mu$ M) for 24 hrs. Measured using Celltiter Glo Assay. Doxorubicin (Dox, 50  $\mu$ M) used as a positive control. *Points*, biological replicates. *Columns*, mean of n = 3. *Bars*, SEM. Significance to control (untreated) using one-way ANOVA, \*\*\*\*  $p < 0.0001$ . (b) 2D cell viability of U87 following treatment with SiNP (+ 1  $\mu$ g / mL, ++ 10  $\mu$ g / mL, +++ 100  $\mu$ g / mL, as indicated) membrane dye (1  $\mu$ M) and combination over 72 hours. Doxorubicin (Dox, 0.25  $\mu$ M) used as a positive control. Measured using a Resazurin-based cell viability assay. *Points*, biological replicates. *Columns*, mean of n = 3. *Bars*, SEM. Significance to control (untreated) using a paired ratio t-test, \*  $p < 0.05$ .



## SUPPLEMENTARY DATA

bioRxiv preprint doi: <https://doi.org/10.1101/2021.10.26.465839>; this version posted October 28, 2021. The copyright holder for this preprint (which was not certified by peer review) is the author/funder. All rights reserved. No reuse allowed without permission.

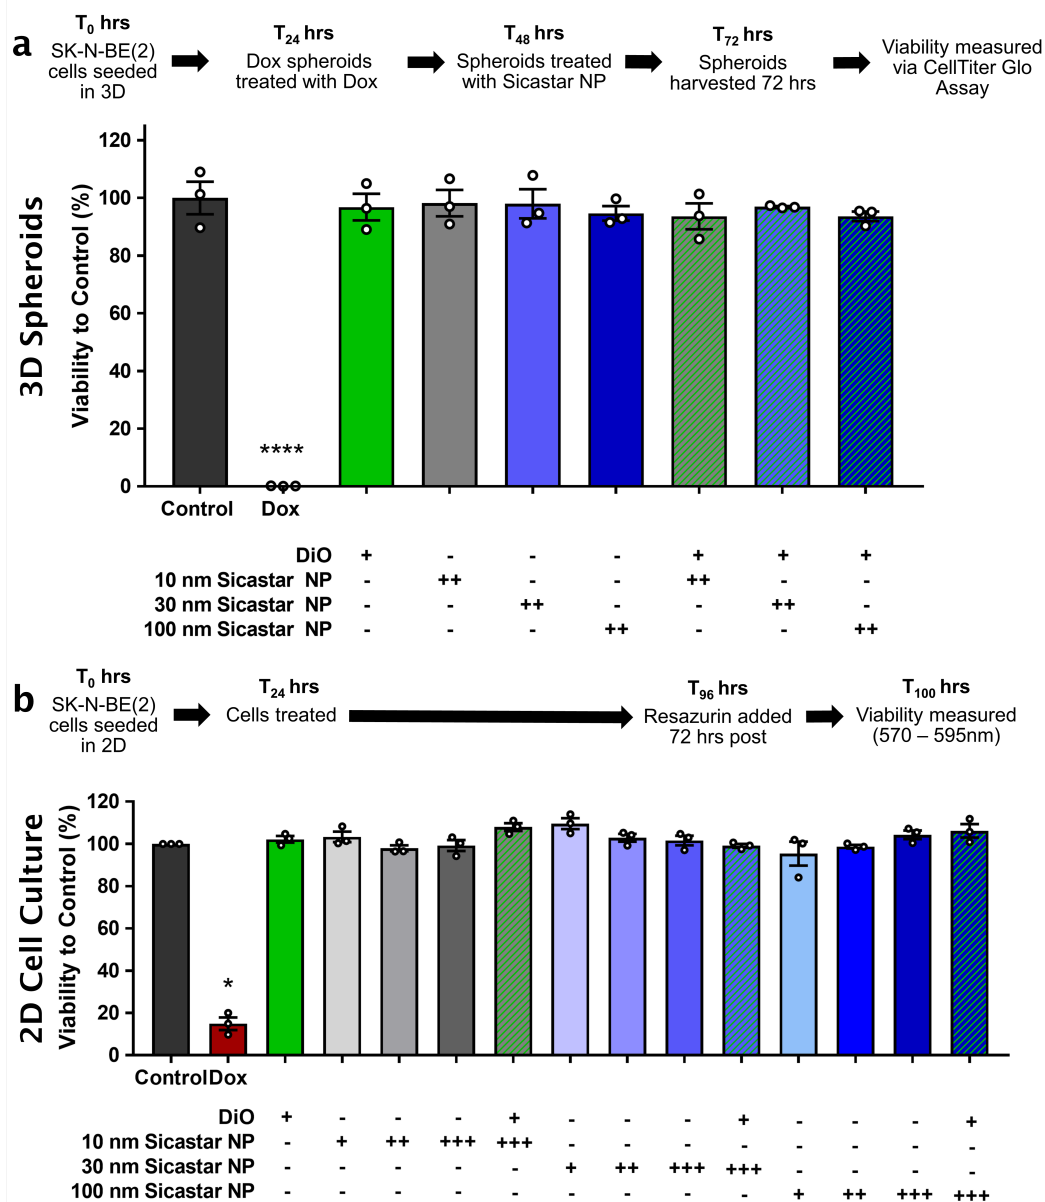

**Supplementary Figure 4: Cell viability of neuroblastoma (SK-N-BE(2)) cells treated with silica nanoparticles (SiNPs) and membrane dye (DiO). (a) 3D cell viability of SK-N-BE(2) following treatment SiNPs alone or in combination with membrane dye (1  $\mu$ M) for 24 hrs. Measured using Celltiter Glo Assay. Doxorubicin (Dox, 50  $\mu$ M) used as a positive control. *Points*, biological replicates. *Columns*, mean of n = 3. *Bars*, SEM. Significance to control (untreated) using one-way ANOVA, \*\*\*\*  $p < 0.0001$ . (b) 2D cell viability of SK-N-BE(2) following treatment with SiNP (+ 1  $\mu$ g / mL, ++ 10  $\mu$ g / mL, +++ 100  $\mu$ g / mL, as indicated) membrane dye (1  $\mu$ M) and combination over 72 hours. Doxorubicin (Dox, 0.25  $\mu$ M) used as a positive control Measured using a Resazurin-based cell viability assay. *Points*, biological replicates. *Columns*, mean of n = 3. *Bars*, SEM. Significance to control (untreated) using a paired ratio t-test, \*  $p < 0.05$ .**

## SUPPLEMENTARY DATA

bioRxiv preprint doi: <https://doi.org/10.1101/2021.10.26.465839>; this version posted October 28, 2021. The copyright holder for this preprint (which was not certified by peer review) is the author/funder. All rights reserved. No reuse allowed without permission.

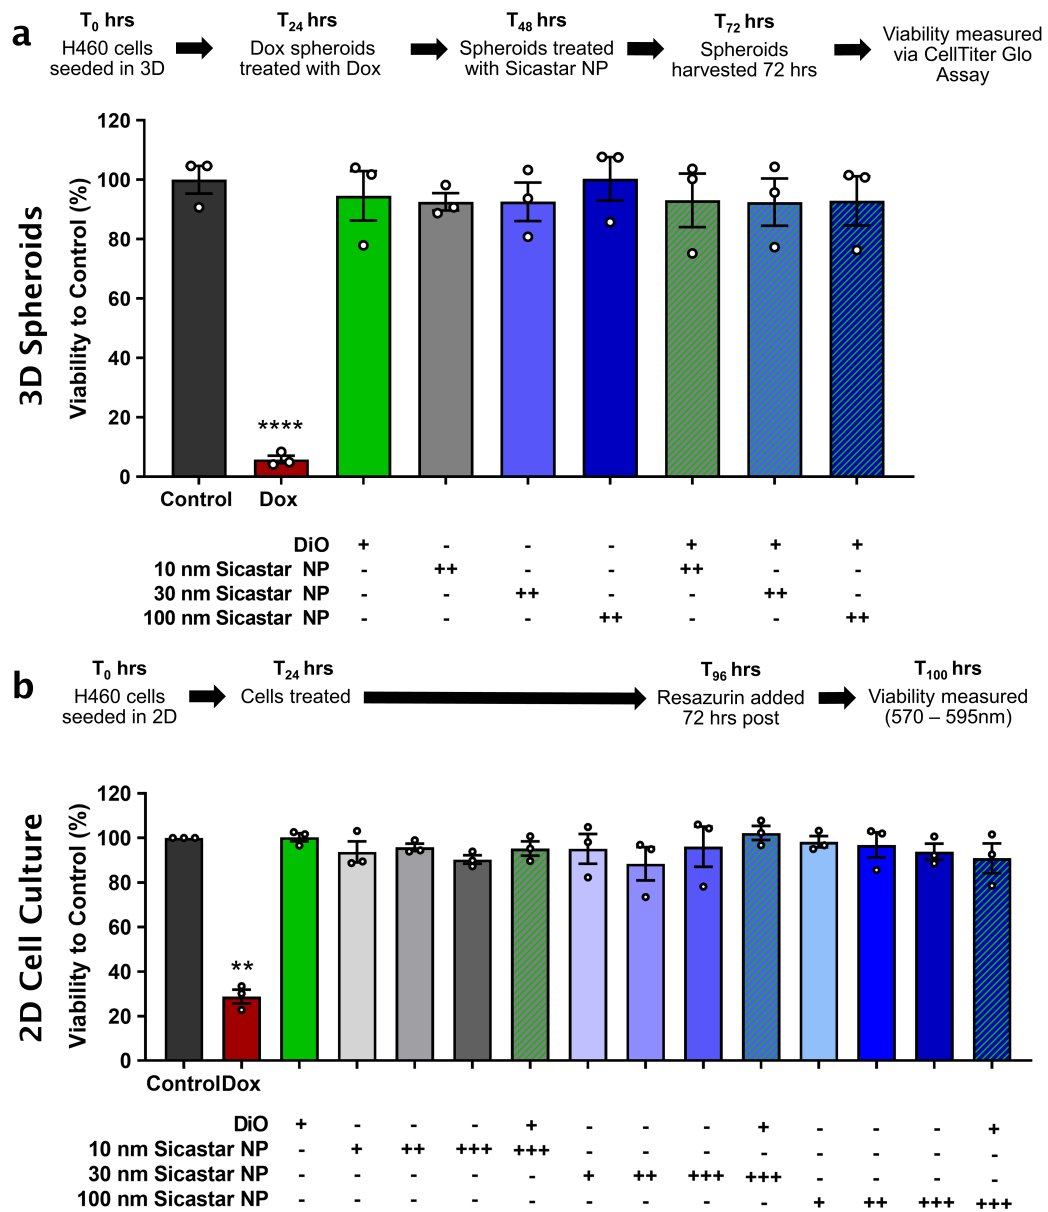

**Supplementary Figure 5: Cell viability of non-small cell lung cancer (H460) cells treated with silica nanoparticles (SiNPs) and membrane dye (DiO). (a)** 3D cell viability of H460 following treatment SiNPs alone or in combination with membrane dye (1  $\mu$ M) for 24 hrs. Measured using Celltiter Glo Assay. Doxorubicin (Dox, 20  $\mu$ M) used as a positive control. *Points*, biological replicates. *Columns*, mean of n = 3. *Bars*, SEM. Significance to control (untreated) using one-way ANOVA, \*\*\*\* $p$  < 0.0001. **(b)** 2D cell viability of H460 following treatment with SiNP (+ 1  $\mu$ g / mL, ++ 10  $\mu$ g / mL, +++ 100  $\mu$ g / mL, as indicated) membrane dye (1  $\mu$ M) and combination over 72 hours. Doxorubicin (Dox, 0.1  $\mu$ M) used as a positive control. Measured using a Resazurin-based cell viability assay. *Points*, biological replicates. *Columns*, mean of n = 3. *Bars*, SEM. Significance to control (untreated) using a paired ratio t-test, \*\* $p$  < 0.01.

## SUPPLEMENTARY DATA

bioRxiv preprint doi: <https://doi.org/10.1101/2021.10.26.465839>; this version posted October 28, 2021. The copyright holder for this preprint (which was not certified by peer review) is the author/funder. All rights reserved. No reuse allowed without permission.

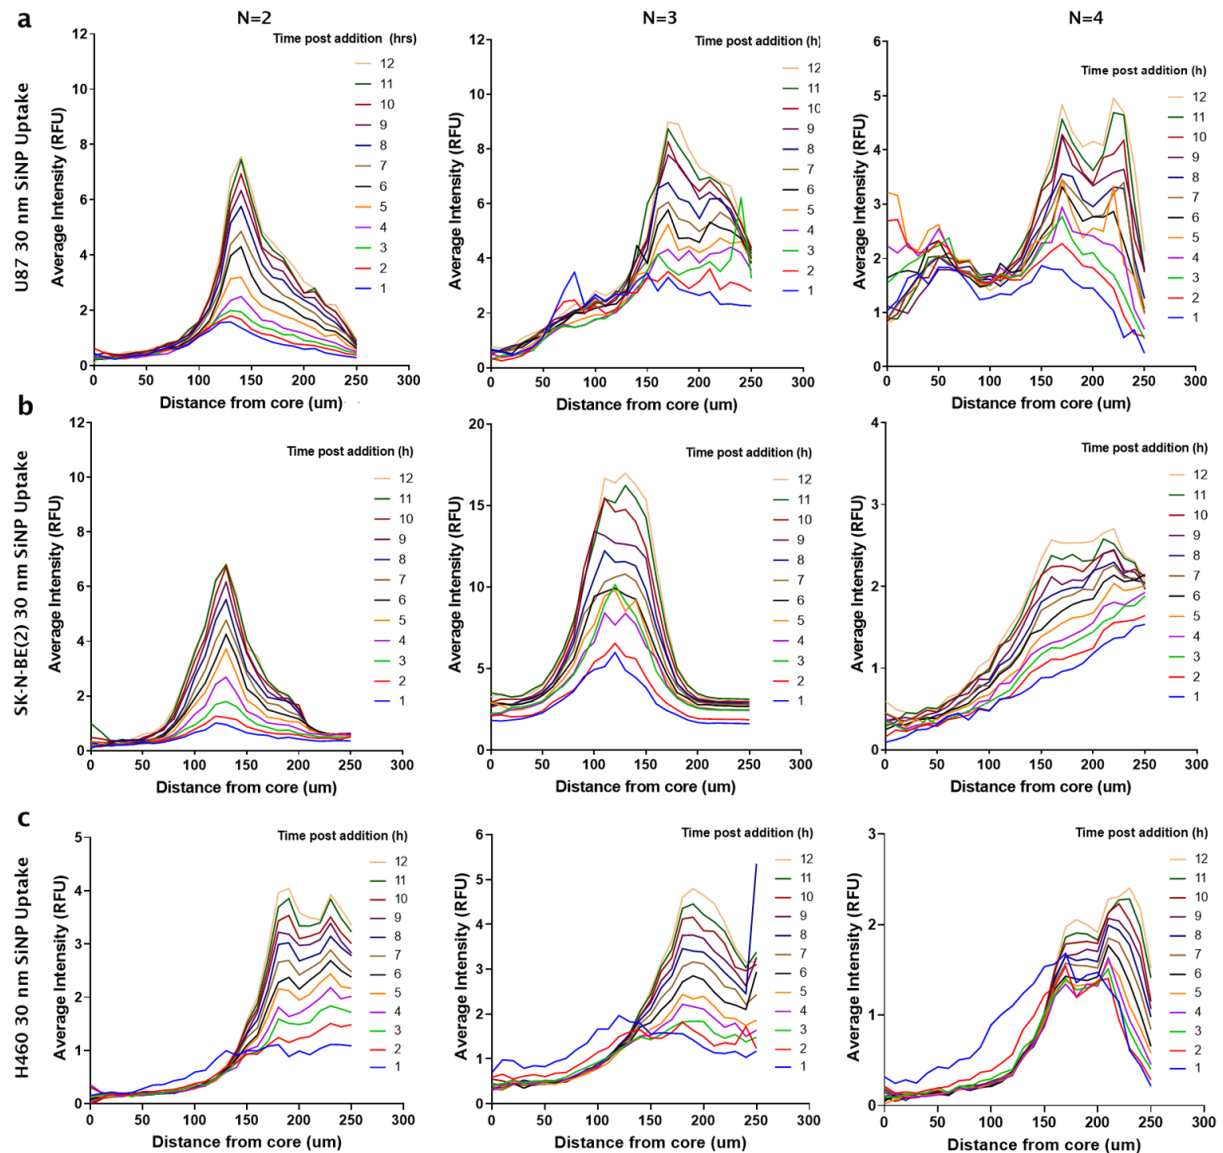

**Supplementary Figure 6: 3D Azimuthal quantification of 30 nm SiNP uptake in (a) glioblastoma (U87), (b) neuroblastoma (SK-N-BE(2)) and (c) non-small cell lung cancer (H460) cell spheroids. Each graph represents 30 nm SiNP tumor spheroid uptake of a biologically independent experiment, in addition to the data presented elsewhere.**

## SUPPLEMENTARY DATA

bioRxiv preprint doi: <https://doi.org/10.1101/2021.10.26.465839>; this version posted October 28, 2021. The copyright holder for this preprint (which was not certified by peer review) is the author/funder. All rights reserved. No reuse allowed without permission.

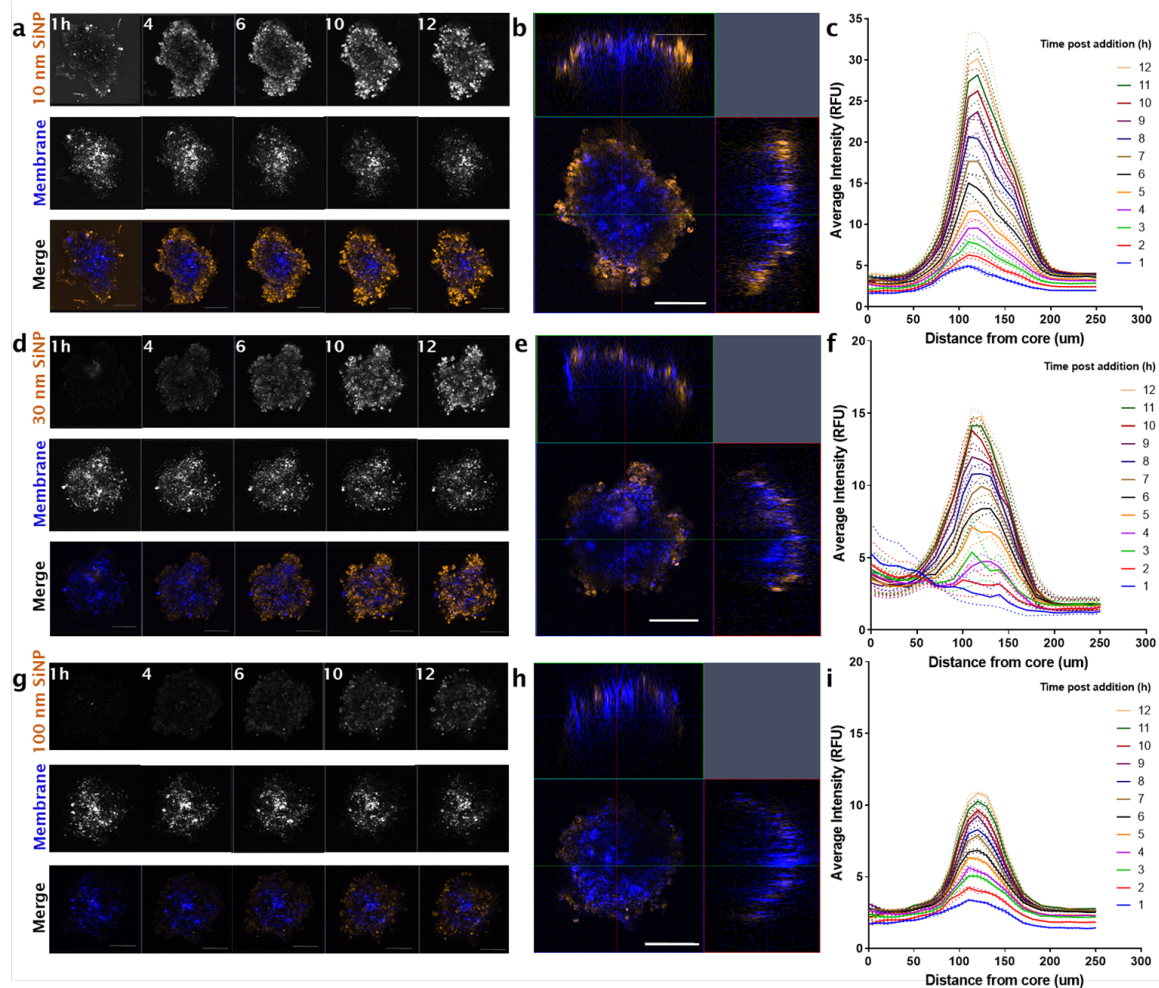

**Supplementary Figure 7: Silica nanoparticle (SiNP) uptake in neuroblastoma (SK-N-BE(2)) tumor spheroids over 12 hours.** (a) Representative maximum intensity projections of 10 nm SiNP, membrane (DiO) and merge at 1, 4, 6, 10, 12 hours post addition (Orange, SiNP; Blue, Membrane). Z-stack images acquired using a Zeiss 880 confocal microscope (Fast Airy, sequential frame-fast laser excitation at 488 nm and 561 nm, 10X objective). (b) Orthogonal (XY, XZ, ZY) merge of SK-N-BE(2) spheroid at six hours post SiNP addition, representative of  $n = 4$ . (c) Representative quantification of nanoparticle uptake from the core of the spheroid to the circumference over time with increased 10 nm SiNP penetration. Analysis conducted using a 3D azimuth averaging custom script, MATLAB (2020a). Workflow above was performed for 30 nm SiNP showing (d) maximum intensity projections over 1, 4, 6, 10, 12 hours post SiNP addition; (e) orthogonal merge at six hours and (f) azimuth quantification respectively. Imaging and analysis also performed for 100 nm SiNP in panels (g) maximum intensity projections; (h) orthogonal merge at six hours and (i) quantification of 100 nm SiNP uptake. Lines, mean of  $t=3$  analysis iterations. Dotted lines, error SEM. Scale bar, 100  $\mu\text{m}$ .

## SUPPLEMENTARY DATA

bioRxiv preprint doi: <https://doi.org/10.1101/2021.10.26.465839>; this version posted October 28, 2021. The copyright holder for this preprint (which was not certified by peer review) is the author/funder. All rights reserved. No reuse allowed without permission.

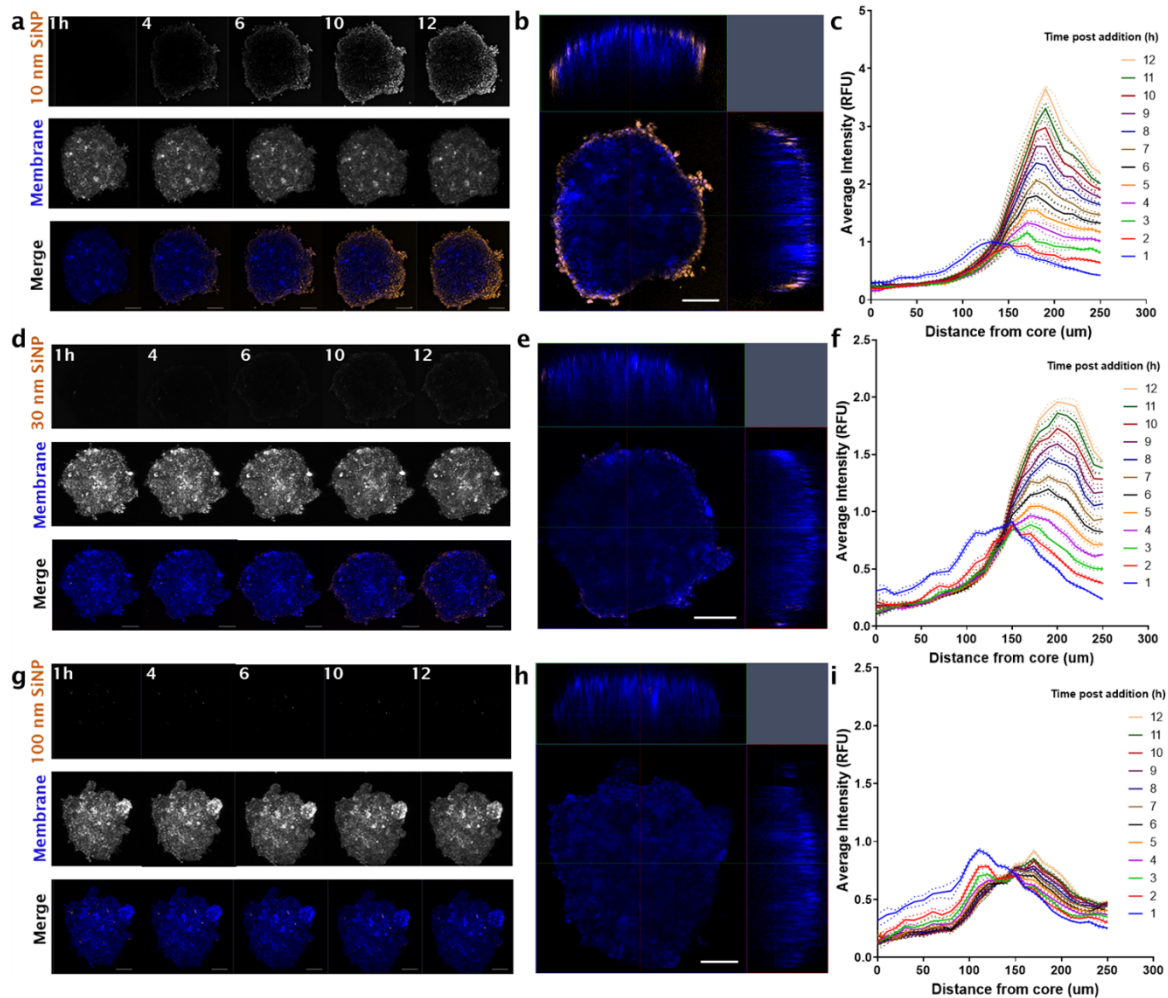

**Supplementary Figure 8: Silica nanoparticle (SiNP) uptake in non-small cell lung cancer (H460) tumor spheroids over 12 hours.** (a) Representative maximum intensity projections of 10 nm SiNP, membrane (DiO) and merge at 1, 4, 6, 10, 12 hours post addition (Orange, SiNP; Blue, Membrane). Z-stack images acquired using a Zeiss 880 confocal microscope (Fast Airy, sequential frame-fast laser excitation at 488 nm and 561 nm, 10X objective). (b) Orthogonal (XY, XZ, ZY) merge of H460 spheroid at six hours post SiNP addition, representative of  $n = 4$ . (c) Representative quantification of nanoparticle uptake from the core of the spheroid to the circumference over time with increased 10 nm SiNP penetration. Analysis conducted using a 3D azimuth averaging custom script, MATLAB (2020a). Workflow above was performed for 30 nm SiNP showing (d) maximum intensity projections over 1, 4, 6, 10, 12 hours post SiNP addition; (e) orthogonal merge at six hours and (f) azimuth quantification respectively. Imaging and analysis also performed for 100 nm SiNP in panels (g) maximum intensity projections; (h) orthogonal merge at six hours and (i) quantification of 100 nm SiNP uptake. Lines, mean of  $t=3$  analysis iterations. Dotted lines, error SEM. Scale bar, 100  $\mu\text{m}$ .

## SUPPLEMENTARY DATA

bioRxiv preprint doi: <https://doi.org/10.1101/2021.10.26.465839>; this version posted October 28, 2021. The copyright holder for this preprint (which was not certified by peer review) is the author/funder. All rights reserved. No reuse allowed without permission.

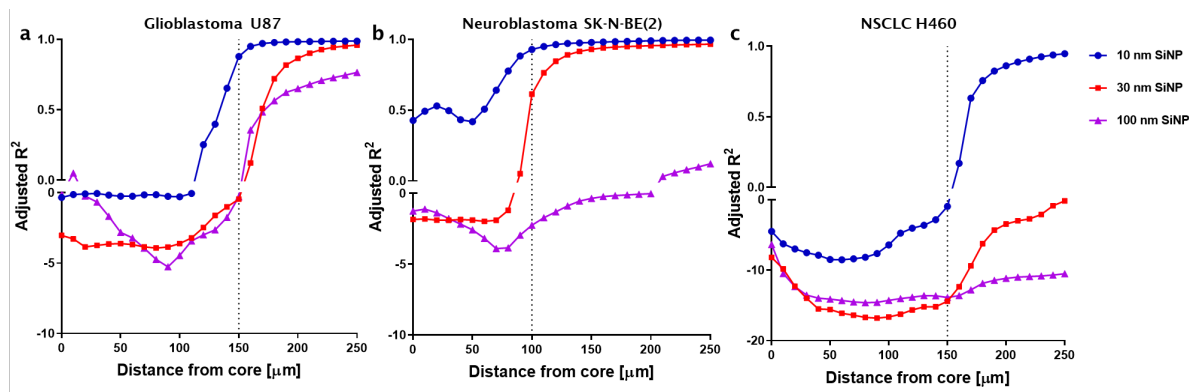

**Supplementary Figure 9: Adjusted  $r$  squared ( $R^2$ ) fit values for silica nanoparticle (SiNP) diffusion kinetics for (a) glioblastoma U87 (b) neuroblastoma (SK-N-BE(2)) and (c) H460 spheroids, calculated using the forward in time, central in space (FTCS) coefficient method. Dotted lines, right side indicating improved fit of model with  $R^2 \rightarrow 0.99$ , excluding 100 nm SiNP in SK-N-BE(2) and 30 nm, 100 nm in H460 which did not show  $R^2$  above 0.25.**

**Supplementary Table 1: Cell characteristics of U87, SK-N-BE(2) and H460 with the mean and median diameters, alongside cell counts and deformation. Quantified using single-cell force imaging cytometry at a total flow rate of  $0.160 \text{ uL s}^{-1}$ .**

| Cell Line  | Diameter ( $\mu\text{m}$ )<br>Mean $\pm$ SD | Diameter ( $\mu\text{m}$ )<br>Median $\pm$ SD | Deformation<br>Mean $\pm$ SD | Cell Count<br>( $n_{\text{total}}$ ) |
|------------|---------------------------------------------|-----------------------------------------------|------------------------------|--------------------------------------|
| U87        | $19.61 \pm 0.54$                            | $19.05 \pm 0.66$                              | $0.056 \pm 0.004$            | 13663                                |
| SK-N-BE(2) | $12.49 \pm 0.45$                            | $12.16 \pm 0.54$                              | $0.033 \pm 0.004$            | 7160                                 |
| H460       | $15.93 \pm 0.08$                            | $15.64 \pm 0.11$                              | $0.022 \pm 0.001$            | 17336                                |

## SUPPLEMENTARY DATA

bioRxiv preprint doi: <https://doi.org/10.1101/2021.10.26.465839>; this version posted October 28, 2021. The copyright holder for this preprint (which was not certified by peer review) is the author/funder. All rights reserved. No reuse allowed without permission.

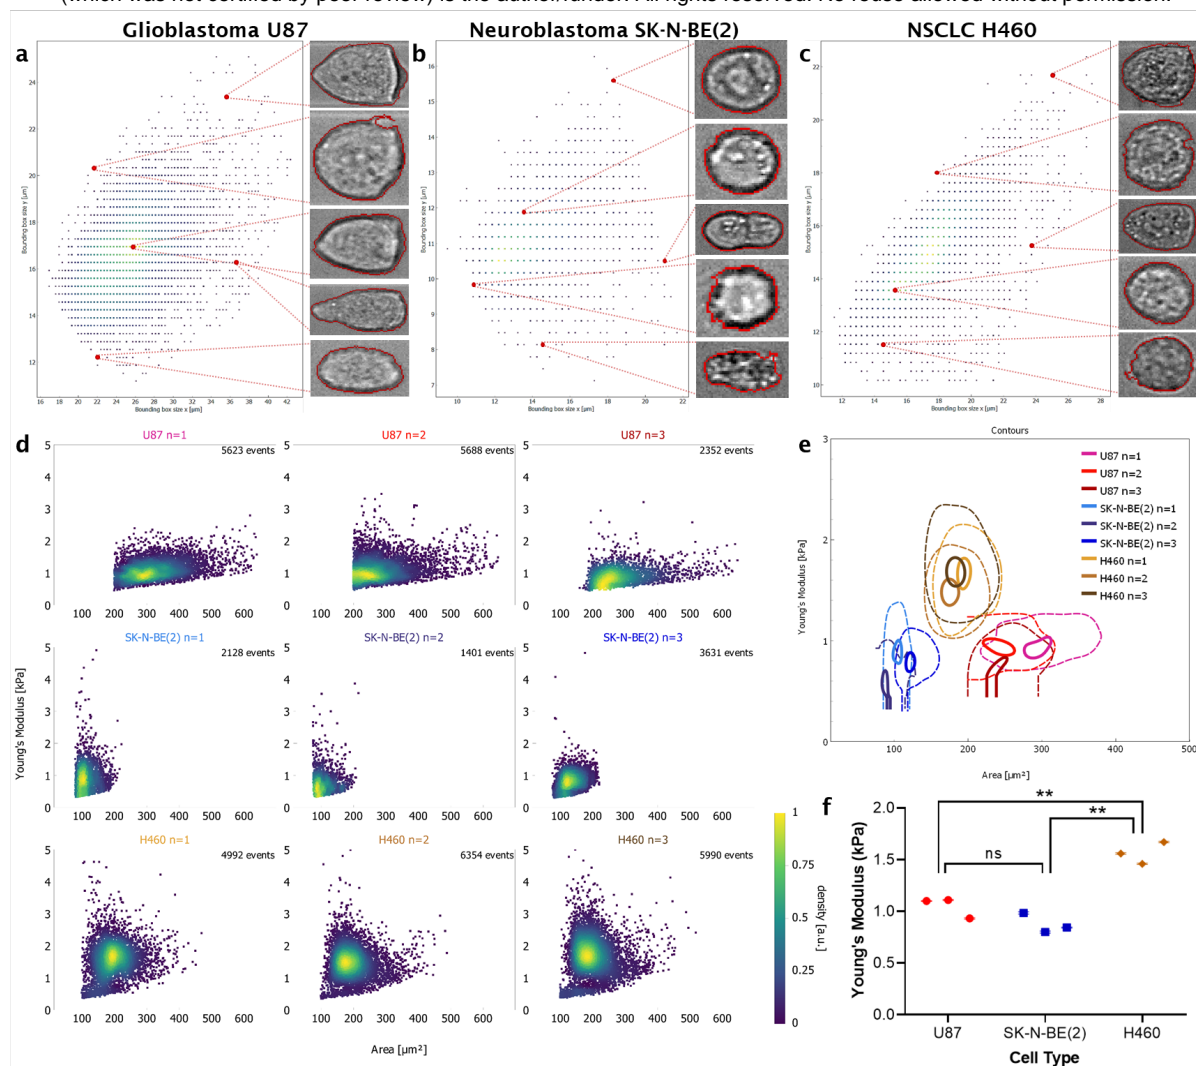

**Supplementary Figure 10: Single cell stiffness of U87, SK-N-BE(2) and H460 cells,** measured using force imaging cytometry (AcCellerator, Zellmechanik Dresden). Representative images of single cells of **(a)** U87, **(b)** SK-N-BE(2) and **(c)** H460 which were imaged at a total flow rate of  $0.16 \text{ uL s}^{-1}$ . Cells were gated according to size in X and Y as above to ensure single cell suspensions. **(d)** Scatter plots generated of cell area versus Young's Modulus calculated for each biological run, 1400 minimum cells per run. Heat map representative of count rate across single cell scatter. **(e)** Contour plots of Young's Modulus for each cell line. *Solid line*, 95<sup>th</sup> percentile. *Dotted lines*, 50<sup>th</sup> percentile of total cell population. The average of these values was then used in **(f)** to calculate significant differences of Young's Modulus between cell types. *Points*, mean of biological replicate. *Bars*, SEM. Significance by unpaired t-tests with Tukey correction, ns, non-significant, \*\*  $p < 0.01$ .

## SUPPLEMENTARY DATA

bioRxiv preprint doi: <https://doi.org/10.1101/2021.10.26.465839>; this version posted October 28, 2021. The copyright holder for this preprint (which was not certified by peer review) is the author/funder. All rights reserved. No reuse allowed without permission.

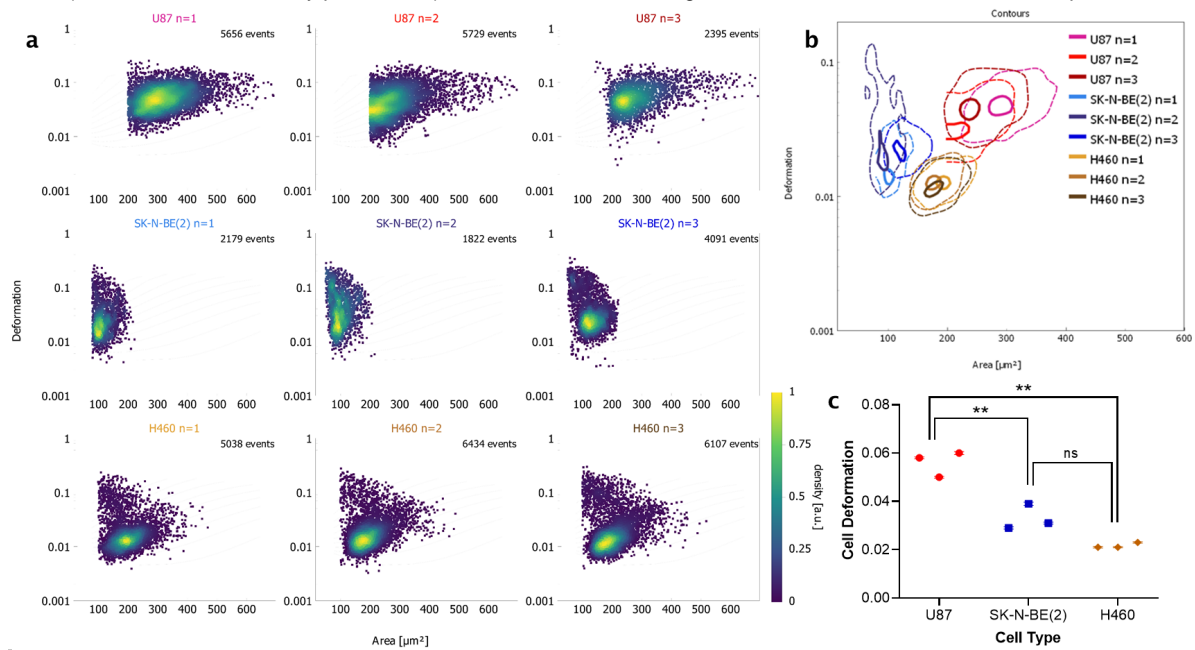

**Supplementary Figure 11: Single cell deformation of U87, SK-N-BE(2) and H460 cells,** measured using force imaging cytometry (AcCellerator, Zellmechanik Dresden). Data from Supplementary Figure 10 was similarly used to calculate the degree of deformation caused by sheath flow ( $0.12 \text{ uL s}^{-1}$ ). **(d)** Scatter plots generated of cell area versus cell deformation for each biological run. Heat map representative of count rate across single cell scatter. **(e)** Contour plots of deformation for each cell line. *Solid line*, 95<sup>th</sup> percentile. *Dotted lines*, 50<sup>th</sup> percentile of total cell population. The average of these values was then used in **(f)** to calculate significant differences of cell deformation potential between cell types. *Points*, mean of biological replicates. *Bars*, SEM. Significance by unpaired t-tests with Tukey correction, ns, non-significant, \*\*  $p < 0.01$ .
